# Supplementary material for: Ampere-level current density ammonia electrochemical synthesis using CuCo nanosheets simulating nitrite reductase bifunctional nature
Source: PubMed Central journal article supplement (PMC9780304; doi:10.1038/s41467-022-35533-6), 2022-12-22
Supplement: 41467_2022_35533_MOESM1_ESM.pdf [file 41467_2022_35533_MOESM1_ESM.pdf]

# Supplementary Information

Ampere-Level Current Density Ammonia Electrochemical Synthesis  
using CuCo nanosheets simulating Nitrite reductase bifunctional Nature

Jia-Yi Fang<sup>a,†</sup>, Qi-Zheng Zheng<sup>a,†</sup>, Yao-Yin Lou<sup>a,b,\*</sup>, Kuang-Min Zhao<sup>a</sup>, Sheng-Nan Hu<sup>a</sup>, Guang  
Li<sup>a</sup>, Ouardia Akdim<sup>c</sup>, Xiao-Yang Huang<sup>a,c</sup>, and Shi-Gang Sun<sup>a,\*</sup>

## Affiliations

<sup>a</sup> State Key Laboratory of Physical Chemistry of Solid Surfaces, Department of Chemistry, College of Chemistry and Chemical Engineering, Xiamen University, Xiamen, 361005, China.

<sup>b</sup> School of Chemical and Environmental Engineering, College of Chemistry, Chemical Engineering and Materials Science, Soochow University, Suzhou, Jiangsu 215123, China.

<sup>c</sup> Cardiff Catalysis Institute, School of Chemistry, Cardiff University, Main Building, Park Place, Cardiff, CF10 3AT, UK.

<sup>†</sup>These authors contributed equally to this work.

\*Corresponding authors. Email: yylou@suda.edu.cn (Yao-Yin Lou); sgsun@xmu.edu.cn (Shi-Gang Sun).

## 1. Supplementary Figures.

4

- Supplementary Fig. S1.** XRD spectra of catalysts with different Cu-to-Co ratios.
- Supplementary Fig. S2.** HRTEM images of Cu and Co catalysts.
- Supplementary Fig. S3.** SEM images of catalysts with different Cu-to-Co ratios.
- Supplementary Fig. S4.** XPS peak spectra of catalysts with different Cu-to-Co ratio.
- Supplementary Fig. S5.** XAS spectra of Cu<sub>50</sub>Co<sub>50</sub> catalysts.
- Supplementary Fig. S6.** Bader analysis for Cu(111), Co(111) and CuCo(111).
- Supplementary Fig. S7.** 2D atomic electron density differences of CuCo(111).
- Supplementary Fig. S8.** *j-E* plots on Ni foam and Cu<sub>50</sub>Co<sub>50</sub> / Ni foam.
- Supplementary Fig. S9.** NO<sub>3</sub><sup>-</sup> removal rate on Ni foam and Cu<sub>50</sub>Co<sub>50</sub> / Ni foam.
- Supplementary Fig. S10.** *j-E* plots and the Koutecký-Levich analyses of different catalysts.
- Supplementary Fig. S11.** Electron transfer numbers of NO<sub>3</sub><sup>-</sup>RR on Cu and Co catalysts.
- Supplementary Fig. S12.** *j-E* plots at different NO<sub>3</sub><sup>-</sup> concentration and the corresponding lg(-*j*)-lgC plots.
- Supplementary Fig. S13.** EIS of Cu, Co and Co<sub>50</sub>Cu<sub>50</sub>.
- Supplementary Fig. S14.** H-type electrolytic cell's photo.
- Supplementary Fig. S15.** The quantification of NH<sub>3</sub>, NO<sub>2</sub><sup>-</sup> and NO<sub>3</sub><sup>-</sup>.
- Supplementary Fig. S16.** The OEMS results for the possible gaseous products of NO<sub>3</sub><sup>-</sup>RR.
- Supplementary Fig. S17.** ECSA measurements of catalysts with different Cu-to-Co ratio.
- Supplementary Fig. S18.** ECSA measurements of Ni foam.
- Supplementary Fig. S19.** Bias-current density for NH<sub>3</sub> and NH<sub>3</sub> production yield on catalysts with different Cu/Co ratio.
- Supplementary Fig. S20.** Current density and yield rate for NH<sub>3</sub> on Cu<sub>50</sub>Co<sub>50</sub>/Ni foam.
- Supplementary Fig. S21.** <sup>1</sup>H NMR analysis for the quantitative of ammonia.
- Supplementary Fig. S22.** The time-dependent current density curves on Cu<sub>50</sub>Co<sub>50</sub> modified Ni foam.
- Supplementary Fig. S23.** FE of H<sub>2</sub>, NO<sub>2</sub><sup>-</sup> and NH<sub>3</sub> for Cu<sub>50</sub>Co<sub>50</sub> catalyst at different electrode potentials.
- Supplementary Fig. S24.** The current density at different electrode potentials.
- Supplementary Fig. S25.** FE<sub>NH<sub>3</sub></sub> and product yield rate for NH<sub>3</sub> on Cu<sub>50</sub>Co<sub>50</sub>/Ni foam, Cu<sub>50</sub>Co<sub>50</sub>/Cu foam, Cu<sub>50</sub>Co<sub>50</sub>/CP and Co/ Cu foam.
- Supplementary Fig. S26.** The characteristic of Cu<sub>50</sub>Ni<sub>50</sub> catalyst after NO<sub>3</sub><sup>-</sup>RR operation.
- Supplementary Fig. S27.** FE<sub>NH<sub>3</sub></sub> of Cu<sub>50</sub>Co<sub>50</sub> catalyst in different initial NO<sub>3</sub><sup>-</sup> concentrations.
- Supplementary Fig. S28.** The electrochemical performance on Cu, Cu<sub>50</sub>Co<sub>50</sub> and Co catalysts in neutral electrolyte.
- Supplementary Fig. S29.** Electrochemical *in situ* ATR-FTIR spectra of NO<sub>3</sub><sup>-</sup>RR in D<sub>2</sub>O.
- Supplementary Fig. S30.** Electrochemical *in situ* ATR-FTIR spectra of NO<sub>3</sub><sup>-</sup>RR.
- Supplementary Fig. S31.** EPR spectra of DMPO spin-trapping H\*.
- Supplementary Fig. S32.** Electrochemical SHINERS spectra of NO<sub>3</sub><sup>-</sup>RR on Au@SiO<sub>2</sub>.
- Supplementary Fig. S33.** Electrochemical SHINERS spectra of NO<sub>3</sub><sup>-</sup>RR on Cu and Co catalysts.
- Supplementary Fig. S34.** The thermodynamic cycle used to calculate the Gibbs free energy of NO<sub>3</sub><sup>-</sup> in the aqueous phase (NO<sub>3</sub><sup>-</sup><sub>(l)</sub>) adsorbed onto the electrode surface.

- 2. Supplementary Tables.** **22**
- Supplementary Table S1.** Summary of ICP-OES analysis results for different Cu/Co ratio.
- Supplementary Table S2.** Comparison of the electrocatalytic NO<sub>3</sub><sup>-</sup>RR performances of Cu<sub>50</sub>Co<sub>50</sub> catalysts with other extensively reported electrocatalysts.
- Supplementary Table S3.** TIR peaks for the *in situ* NO<sub>3</sub><sup>-</sup>RR on Cu<sub>50</sub>Co<sub>50</sub>, Cu and Co catalysts.
- Supplementary Table S4.** Raman scattering peaks for *in situ* nitrates reduction on Cu<sub>50</sub>Co<sub>50</sub>, Cu and Co catalysts.
- Supplementary Table S5.** The electronic energies (E), zero-point energies (ZPE) and entropy (TS) corrections for H<sub>2</sub>O(l), H<sub>2</sub>(g), NH<sub>3</sub>(g) and HNO<sub>3</sub>(g) used in the Gibbs free energy calculations.
- Supplementary Table S6.** Adsorption configurations of adsorption species on Cu(111), Co(111) and CuCo(111) surfaces.
- Supplementary Table S7.** The correction of zero-point energy (ZPE) of adsorption species on different catalysts' surfaces.
- Supplementary Table S8.** The correction of entropy (TS) of adsorption species on different catalysts' surfaces.
- Supplementary Table S9.** Calculated electronic energies (E) of adsorption species on different catalysts' surfaces.
- Supplementary Table S10.** Calculated Gibbs free energies (ΔG) of adsorption species for NO<sub>3</sub><sup>-</sup>RR on different catalysts' surfaces with respect to the reference NO<sub>3</sub><sup>-</sup>(l) + \*.
- Supplementary Table S11.** Calculated Gibbs free energies (ΔG) of adsorption species for HER on different catalysts' surfaces with respect to the reference of H<sup>+</sup> + e<sup>-</sup> + \*.
- Supplementary Table S12.** top view and side view of Cu(111), Co(111) and CuCo(111) with different surface exposure structures and the corresponding adsorption configuration of \*NO<sub>3</sub> and \*NO<sub>2</sub>.
- Supplementary Table S13.** Calculated Gibbs free energies (in eV) of \*NO<sub>3</sub> and \*NO<sub>2</sub> on Cu(111), Co(111) and CuCo(111) with different surface exposure structures at 0 V vs. RHE.
- Supplementary Table S14.** Calculated Gibbs free energies (in eV) of \*NO<sub>3</sub> and \*NO<sub>2</sub> on Cu(111), Co(111) and CuCo(111) with different surface exposure structures at -0.2 V vs. RHE.

- 3. Supplementary Notes.** **33**
- Supplementary Note S1.** Details of DFT calculations.
- Supplementary Note S2.** The reference used in the Gibbs free energy calculations.
- Supplementary Note S3.** The initial date calculated for the Gibbs free energy calculations.
- Supplementary Note S4.** Stable configurations of the intermediates on different CuCo surface models.

- 4. References for Supplementary Information.** **36**

Supplementary Figures and Tables.

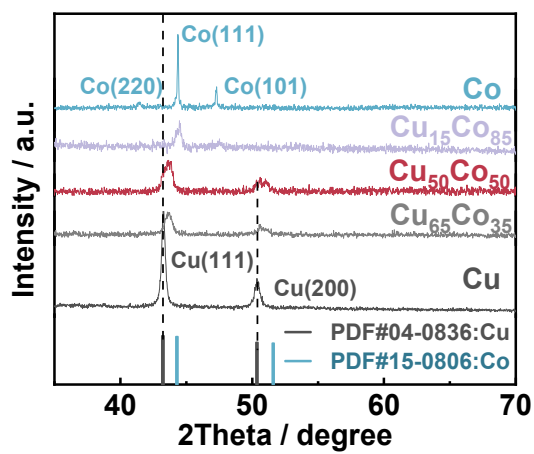

Supplementary Fig. S1. XRD spectra of catalysts with different Cu-to-Co ratios.

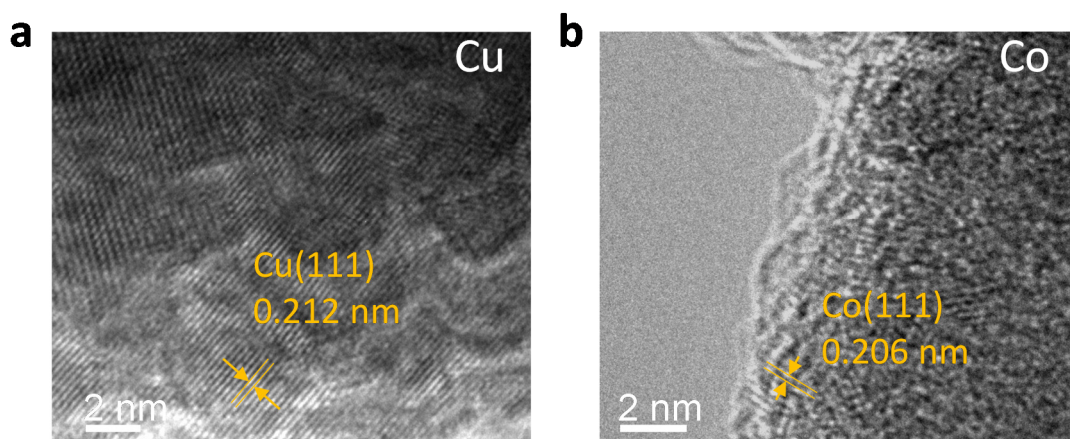

Supplementary Fig. S2. HRTEM images of Cu (a) and Co (b) catalysts.

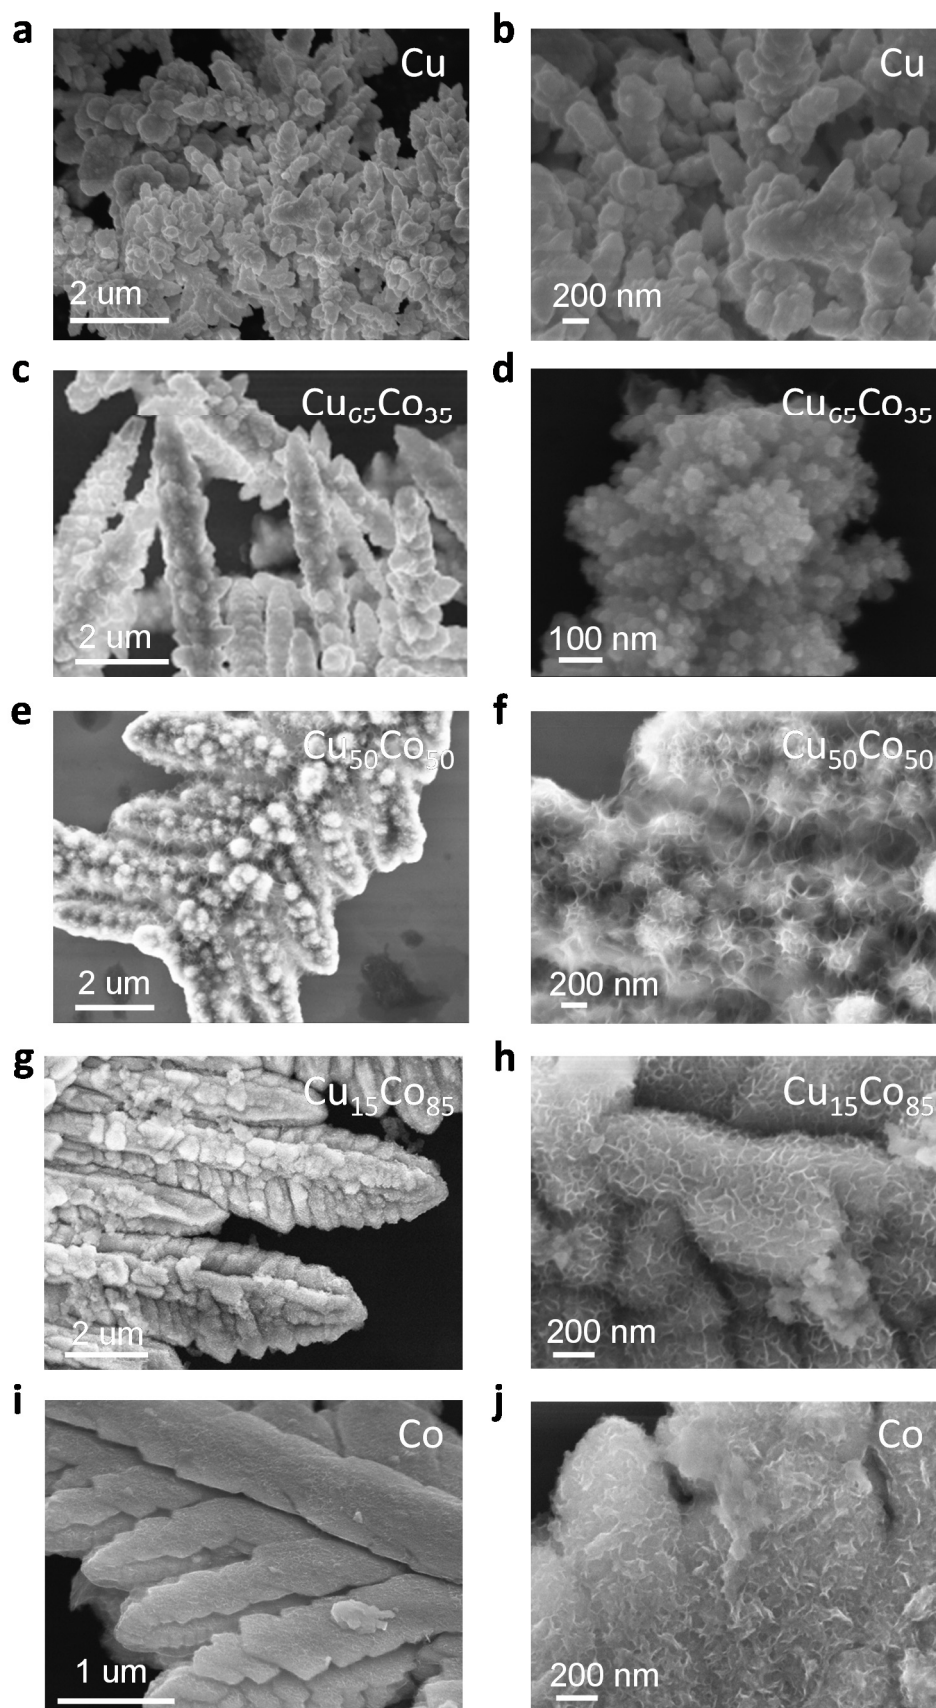

**Supplementary Fig. S3. SEM images of catalysts with different Cu-to-Co ratios. Cu (a) (b),  $\text{Cu}_{65}\text{Co}_{35}$  (c) (d),  $\text{Cu}_{50}\text{Co}_{50}$  (e) (f),  $\text{Cu}_{15}\text{Co}_{85}$  (g) (h), Co (i) (j).**

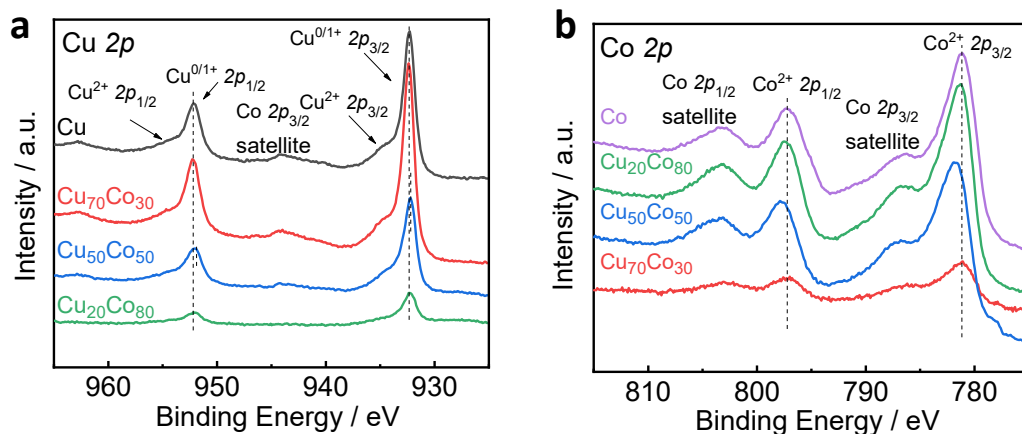

**Supplementary Fig. S4.** XPS peak spectra of catalysts with different Cu-to-Co ratios. Cu 2p (a) and Co 2p (b)

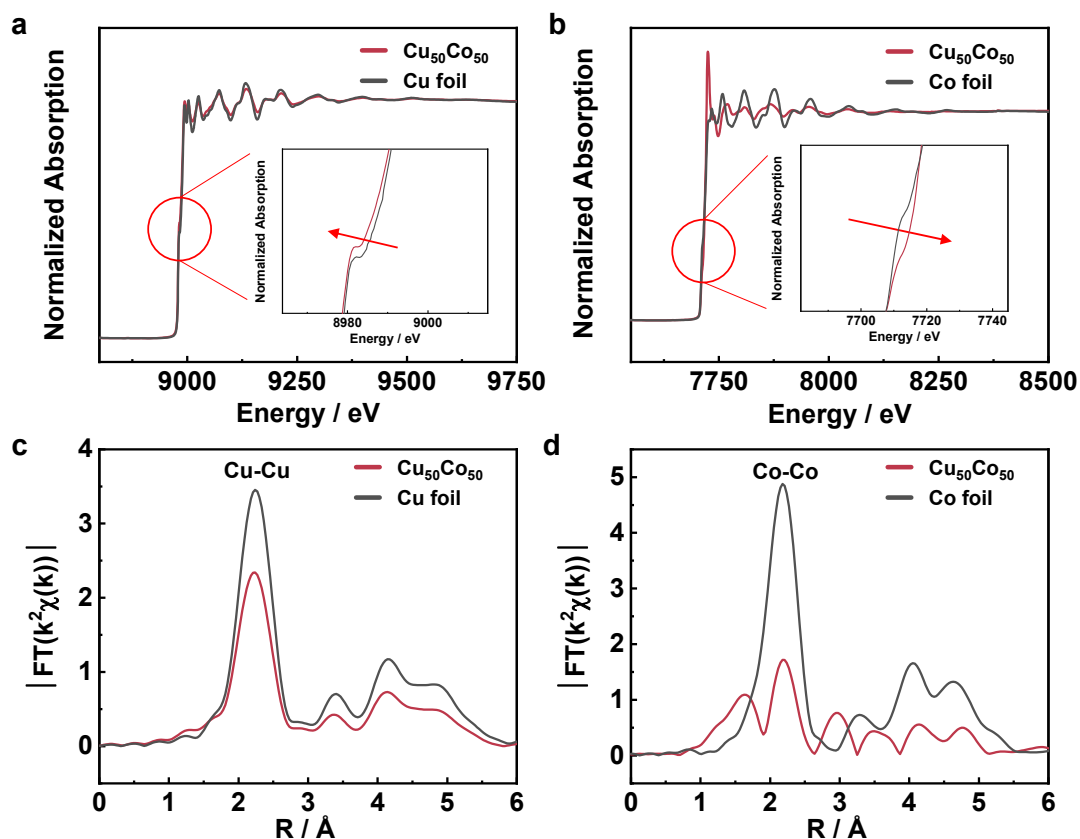

**Supplementary Fig. S5.** XAS analyst of Cu<sub>50</sub>Co<sub>50</sub> catalyst. Extended X-ray absorption fine structure (XANES) spectra of Cu (a) and Co (b) K-edge of Cu<sub>50</sub>Co<sub>50</sub>, compared to the metallic Cu and Co foil used as references. Cu (c) and Co (d) K-edge FT-EXAFS spectra.

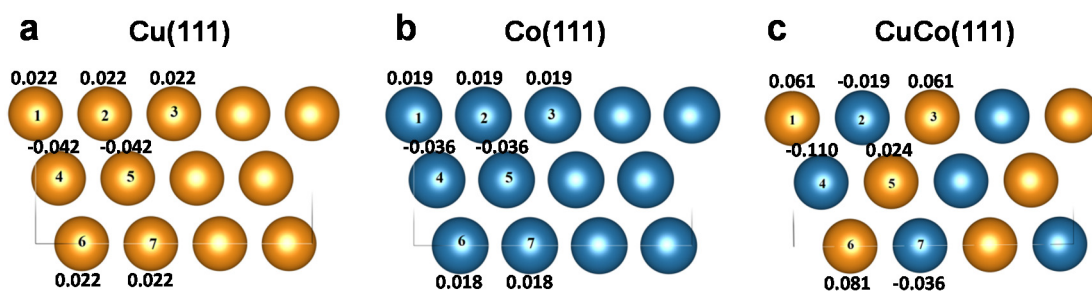

Supplementary Fig. S6. Bader analysis for Cu(111), Co(111) and CuCo(111).

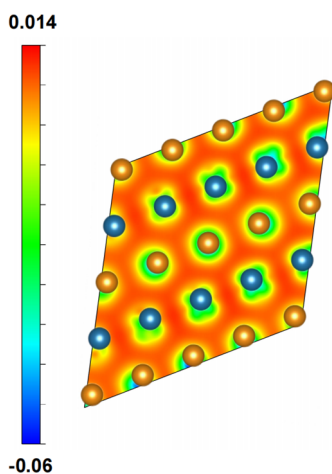

Supplementary Fig. S7. 2D atomic electron density differences of CuCo(111).

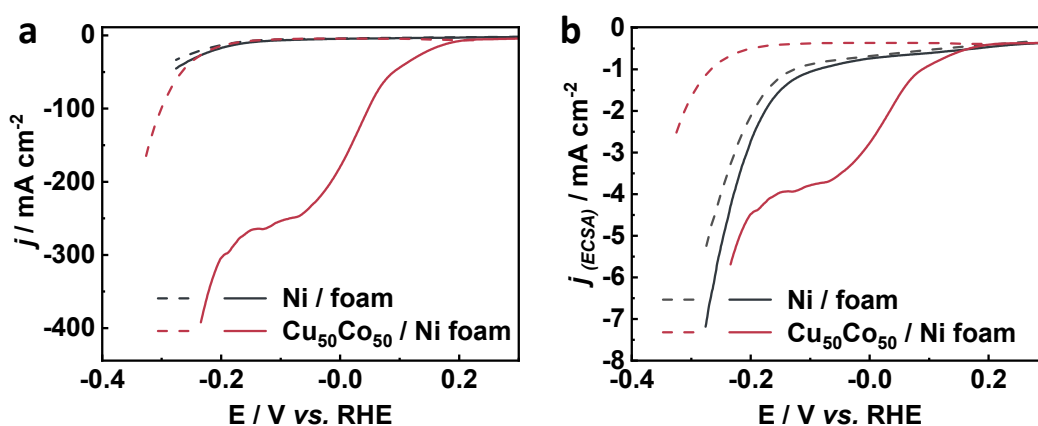

Supplementary Fig. S8.  $j$ - $E$  plots on Ni foam and Cu<sub>50</sub>Co<sub>50</sub> / Ni foam. Current density normalized by geometric area (a) or electrochemical active surface area ( $j_{(ECSA)}$ ) (b)- Electrode potential ( $E$ ) curve (80%  $iR$  corrected) on Ni foam and Cu<sub>50</sub>Co<sub>50</sub> / Ni foam in 1 M KOH solution containing 100 mM KNO<sub>3</sub> (solid lines) or in the absence of KNO<sub>3</sub> (dotted line) at a sweep rate of 1 mV s<sup>-1</sup>.

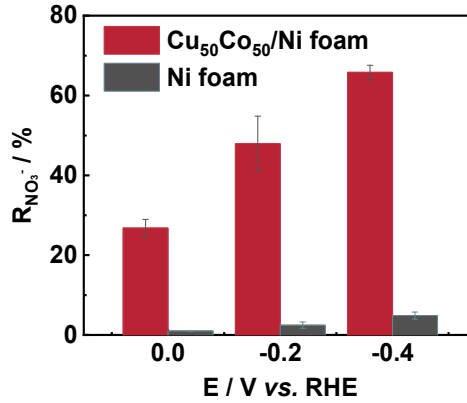

**Supplementary Fig. S9.** NO<sub>3</sub><sup>-</sup> removal rate on Cu<sub>50</sub>Co<sub>50</sub>/Ni foam and Ni foam. The results were performed in electrolyte of 100 mM KNO<sub>3</sub> + 1 M KOH.

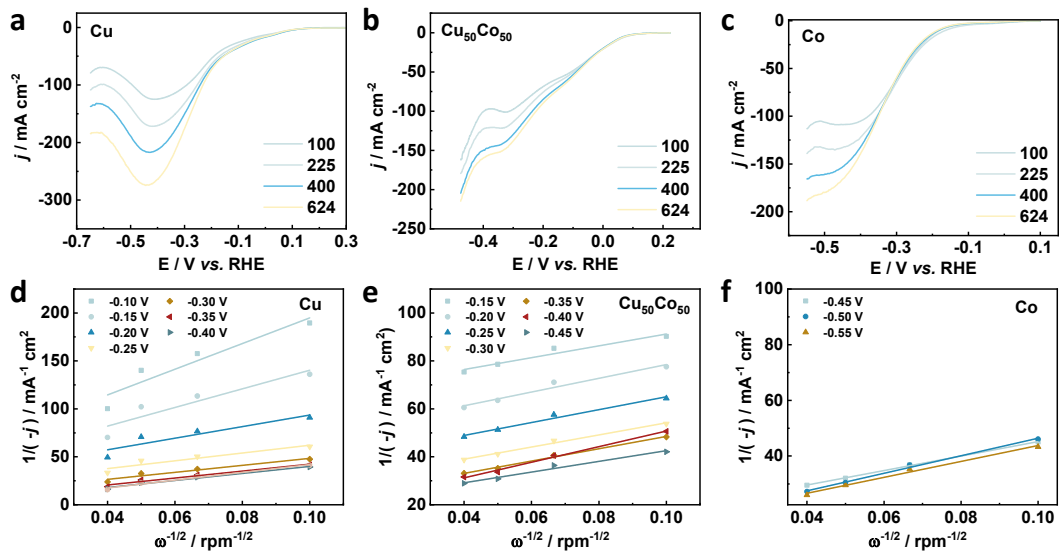

**Supplementary Fig. S10.** *j*-*E* plots at different rotation rates in 100 mM KNO<sub>3</sub> + 1 M KOH on Cu (a), Cu<sub>50</sub>Co<sub>50</sub> (b) and Co (c), and the corresponding Koutecký-Levich curves of different electrode potentials on Cu (d); Cu<sub>50</sub>Co<sub>50</sub> (e) and Co (f).

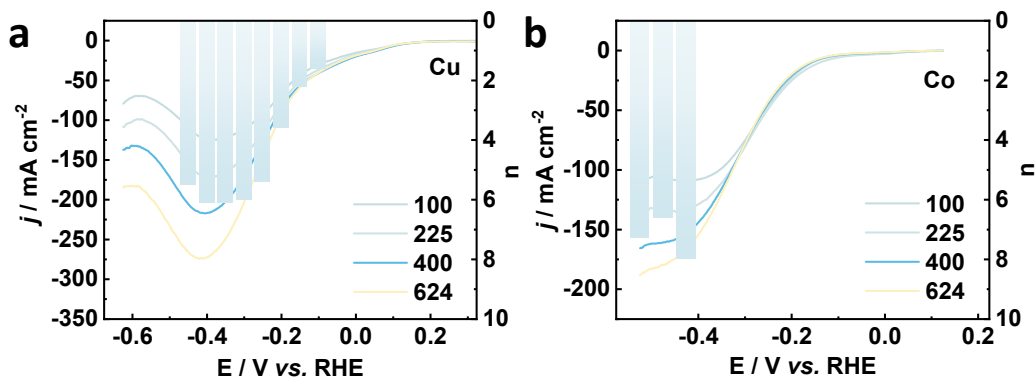

**Supplementary Fig. S11.** Electron transfer numbers of NO<sub>3</sub><sup>-</sup>RR on Cu and Co catalysts. The results were calculated by the K-L equation for Cu (a) and Co (b), in 100 mM KNO<sub>3</sub> + 1 M KOH.



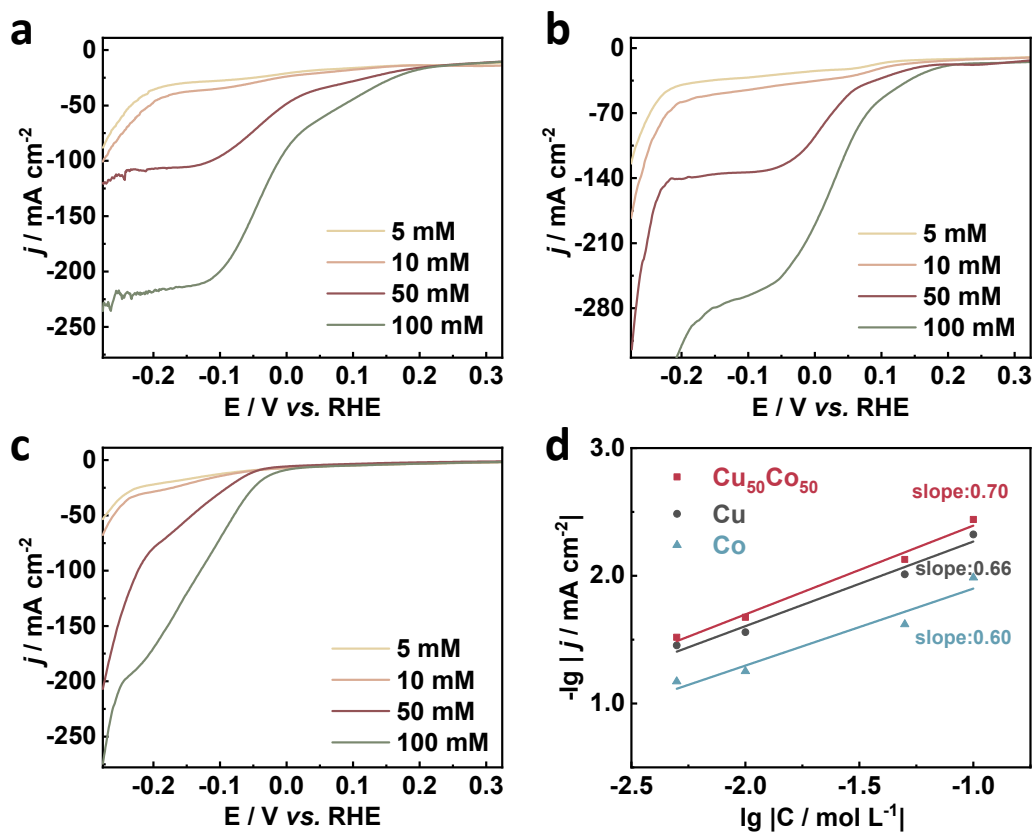

**Supplementary Fig. S12.  $j$ - $E$  plots at different  $\text{NO}_3^-$  concentration and the corresponding  $\lg(-j)$ - $\lg C$  plots.** The curves were got in 1M KOH containing of 5 mM, 10 mM, 50mM or 100 mM  $\text{KNO}_3$  at  $1 \text{ mV s}^{-1}$  on Cu (a),  $\text{Cu}_{50}\text{Co}_{50}$  (b) and Co (c) catalysts.  $\lg(-j)$ - $\lg C$  plots for different catalysts were calculated at  $-0.1 \text{ V vs. RHE}$  (d).

By calculating the relationship between the current density and the nitrate concentration, the rate of  $\text{NO}_3^-$ RR and the  $\text{NO}_3^-$  concentration formed a quasi-first-order reaction relationship. Combined with previous analysis of the Tafel slope results, the rate-determinate step (RDS) was the first electron transfer where adsorbed  $\text{NO}_3^-$  species were reduced. Prior to this step, we speculated that the nitrates were simultaneously adsorbed and desorbed at the catalyst surface, reaching an equilibrium state to satisfy a quasi-first-order reaction relationship with nitrates' concentration.

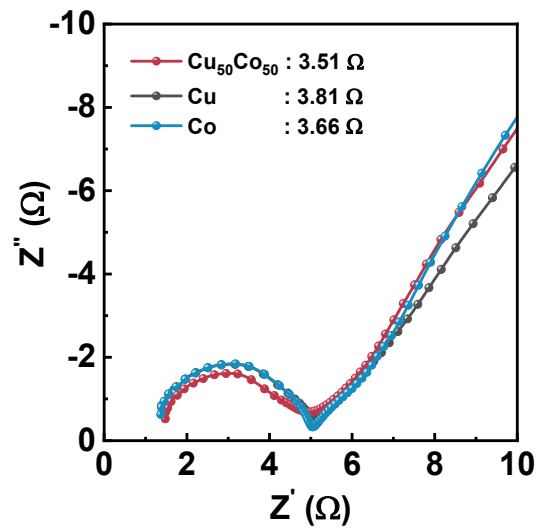

Supplementary Fig. S13. EIS of Cu, Co and  $\text{Cu}_{50}\text{Co}_{50}$  in 1 M KOH.

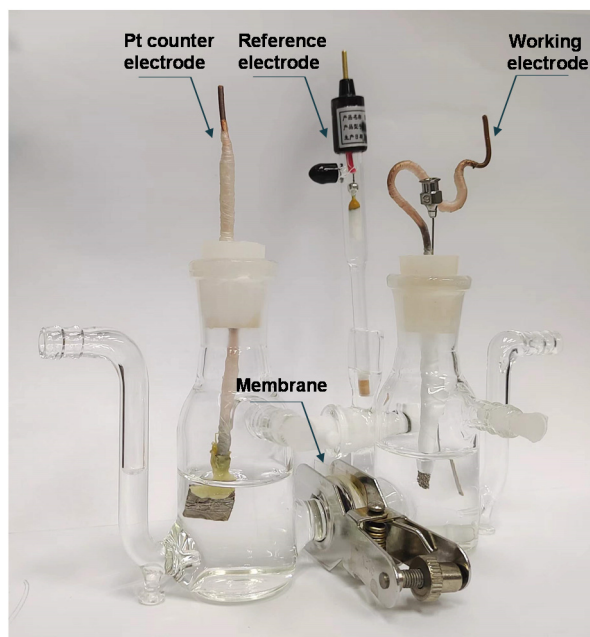

Supplementary Fig. S14. H-type electrolytic cell's photo.

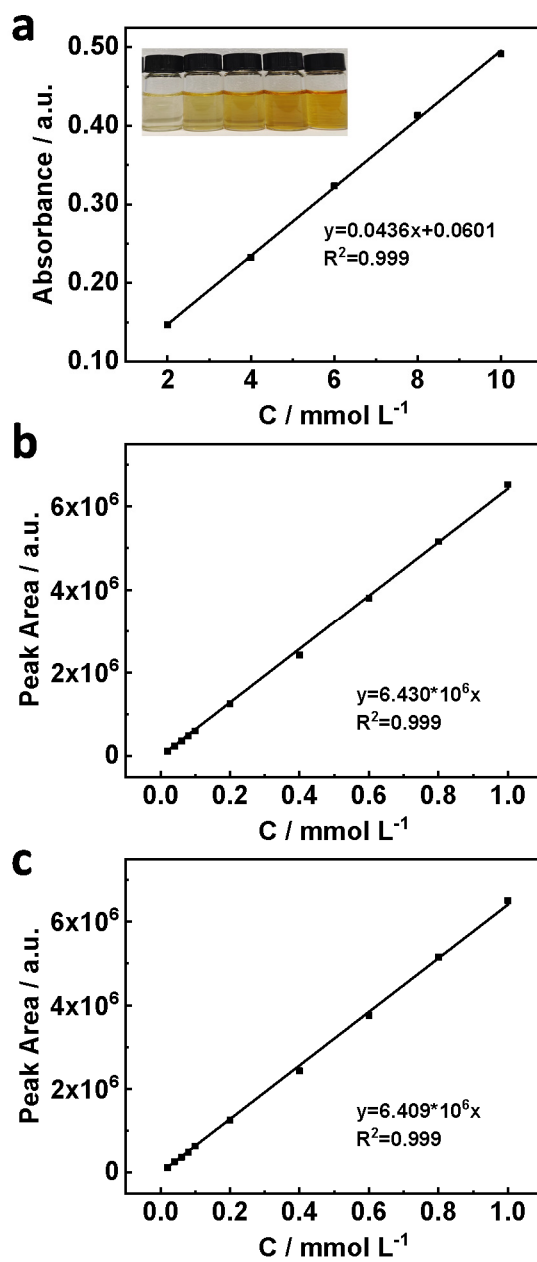

**Supplementary Fig. S15. The quantification of  $\text{NH}_3$ ,  $\text{NO}_2^-$  and  $\text{NO}_3^-$ .** (a) The linear standard curve for the calculation of  $\text{NH}_3$  production using Nessler Reagent method. The linear standard curve for the calculation of  $\text{NO}_2^-$  (b) and  $\text{NO}_3^-$  (c) using ion chromatography.

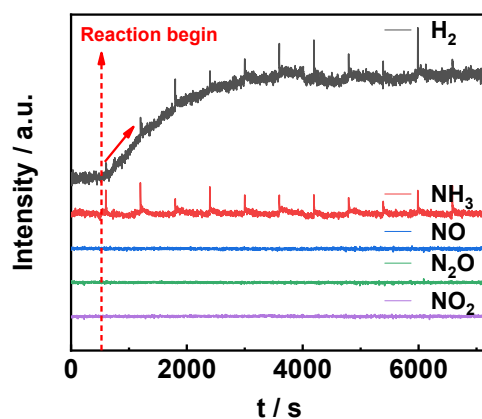

Supplementary Fig. S16. The OEMS result for the possible gaseous products of  $\text{NO}_3^-$ RR. ( $\text{H}_2$ ,  $\text{N}_2$ ,  $\text{NO}$ ,  $\text{NO}_2$ ,  $\text{N}_2\text{O}$  and  $\text{NH}_3(\text{g})$ )

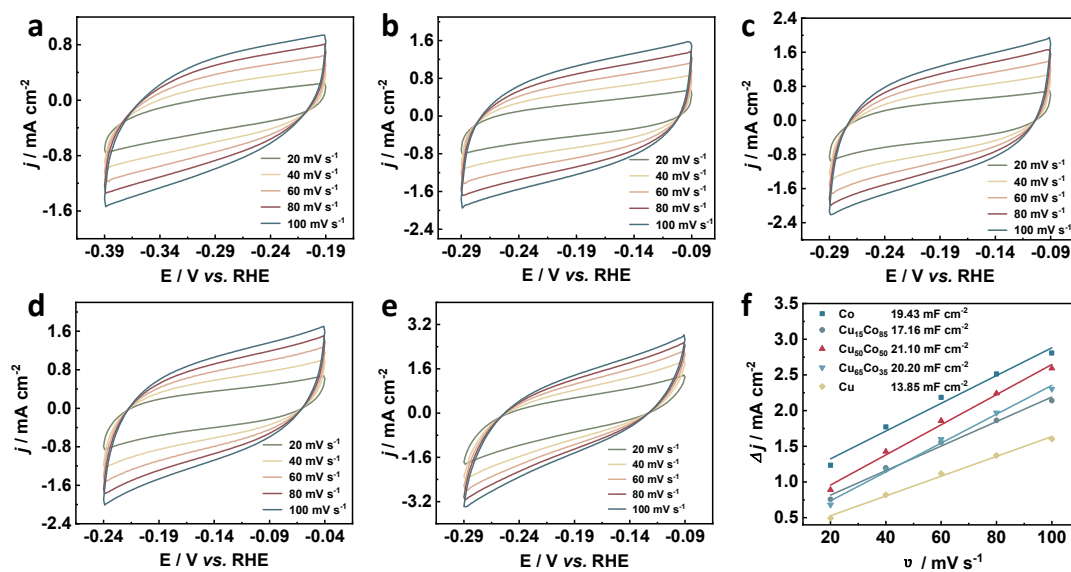

Supplementary Fig. S17. ECSA measurements of the catalysts with different Cu-to-Co ratio. The cyclic voltammograms were obtained on Cu (a),  $\text{Cu}_{65}\text{Co}_{35}$  (b),  $\text{Cu}_{50}\text{Co}_{50}$  (c)  $\text{Cu}_{15}\text{Co}_{85}$  (d) and Co (e) catalysts in 1 M KOH. Double layer capacitance for each catalyst (Reference Cu foil:  $29\mu\text{F cm}^{-2}$ )<sup>1</sup> (f).

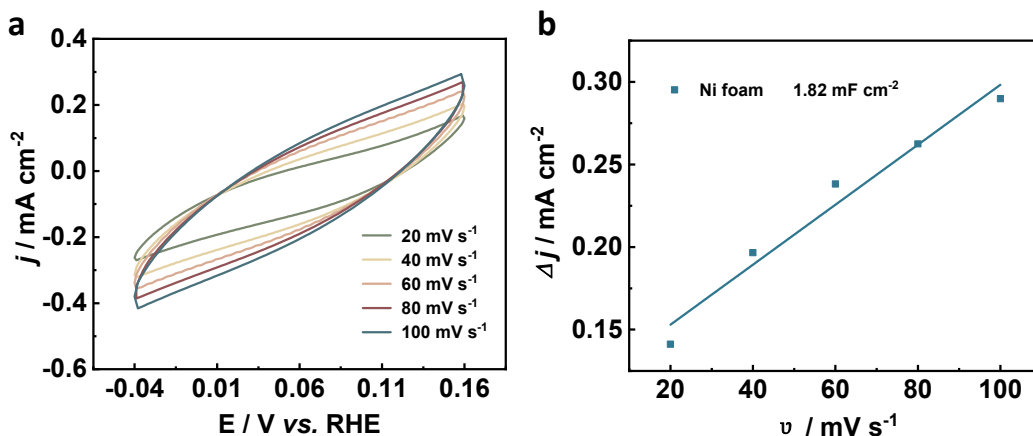

**Supplementary Fig. S18.** ECSA measurements of Ni foam (a) and corresponding double layer capacitance (b).

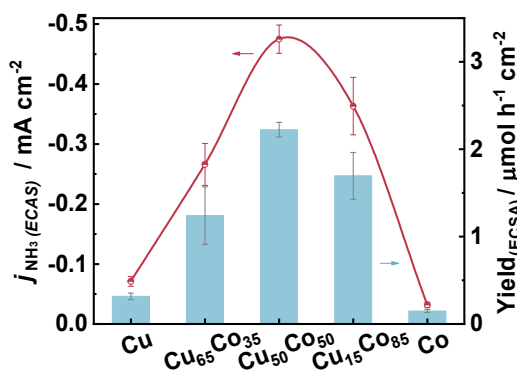

**Supplementary Fig. S19.** Bias-current density for NH<sub>3</sub> and NH<sub>3</sub> production yield normalized by ECSA for catalysts with different Cu/Co ratio in 100 mM KNO<sub>3</sub> + 1M KOH.

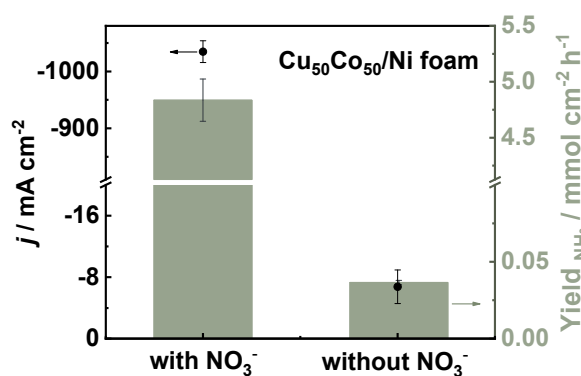

**Supplementary Fig. S20.** Current density and yield rate for NH<sub>3</sub> on Cu<sub>50</sub>Co<sub>50</sub>/Ni foam at -0.2 V vs. RHE in 1 M KOH electrolyte with or without 100 mM KNO<sub>3</sub>.

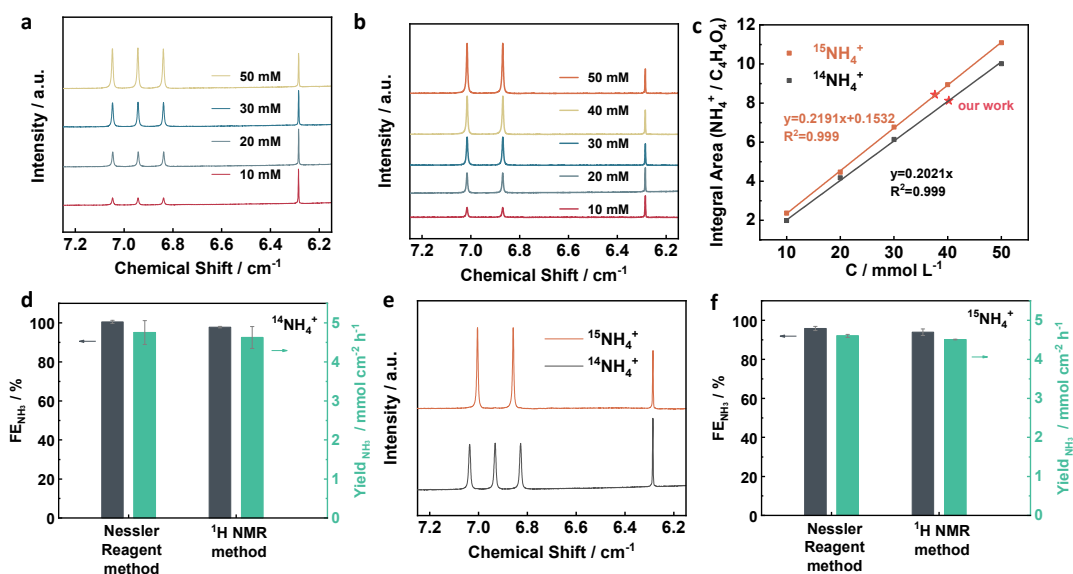

**Supplementary Fig. S21.  $^1\text{H}$  NMR analysis for the quantitative of ammonia.**  $^1\text{H}$  NMR spectra of different concentrations of  $^{14}\text{NH}_4\text{Cl}$  (a) and  $^{15}\text{NH}_4\text{Cl}$  (b) standard solution and the calibration curves of normalized integral area between  $\text{NH}_4^+$  and  $\text{C}_4\text{H}_4\text{O}_4$  vs. the concentration of  $\text{NH}_4^+$  (c). d The  $^{14}\text{NH}_3$  yield rate and Faradaic efficiency detected by  $^1\text{H}$  NMR spectroscopy and the Nessler reagent method at  $-0.2$  V vs. RHE. e  $^1\text{H}$  NMR spectrum of the electrolyte after the electrolysis of  $^{14}\text{NO}_3^-$  and  $^{15}\text{NO}_3^-$  at  $-0.2$  V vs. RHE. f The  $^{15}\text{NH}_3$  yield rate and Faradaic efficiency detected by  $^1\text{H}$  NMR spectroscopy and the Nessler reagent method at  $-0.2$  V vs. RHE.

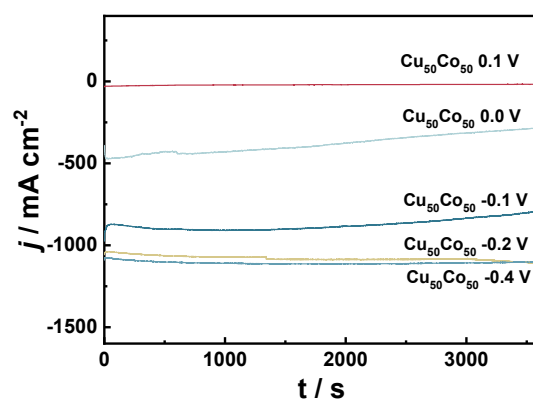

**Supplementary Fig. S22. The time-dependent current density curves on  $\text{Cu}_{50}\text{Co}_{50}$  modified Ni foam.** The curves were got at different electrode potential in 1 M KOH solution containing 100 mM  $\text{KNO}_3$  and with magnetic stirring speed of 1000 rpm.

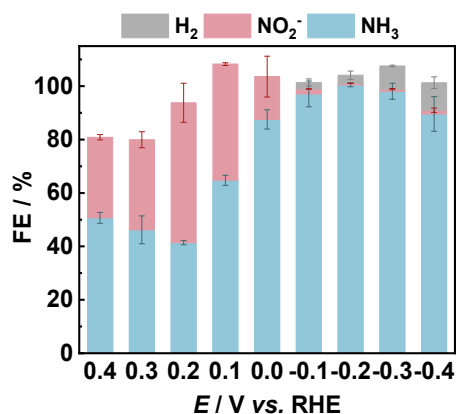

Supplementary Fig. S23. FE of H<sub>2</sub>, NO<sub>2</sub><sup>-</sup> and NH<sub>3</sub> for Cu<sub>50</sub>Co<sub>50</sub> catalyst at different electrode potentials. Electrolyte of 100 mM KNO<sub>3</sub> + 1M KOH.

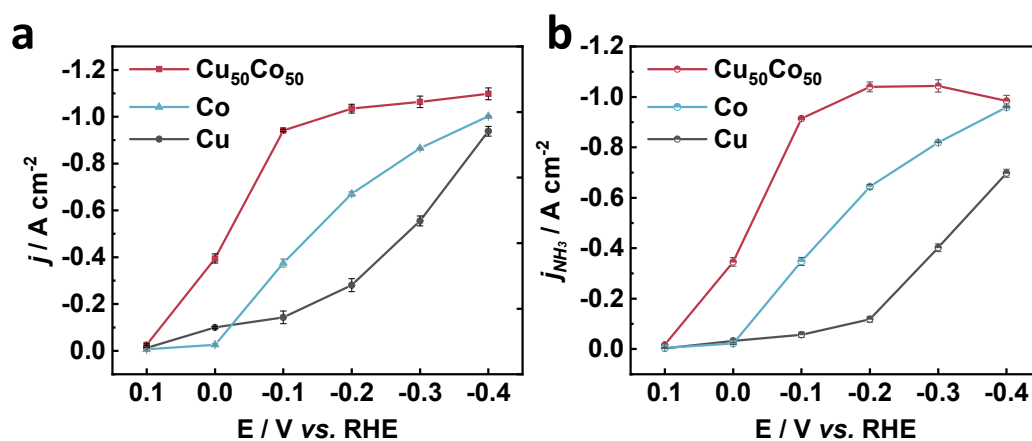

Supplementary Fig. S24. The current density at different electrode potentials. NO<sub>3</sub><sup>-</sup>RR current density (a) and bias-current density for NH<sub>3</sub> (b) on Cu<sub>50</sub>Co<sub>50</sub>, Cu and Co in 100 mM KNO<sub>3</sub> + 1M KOH.

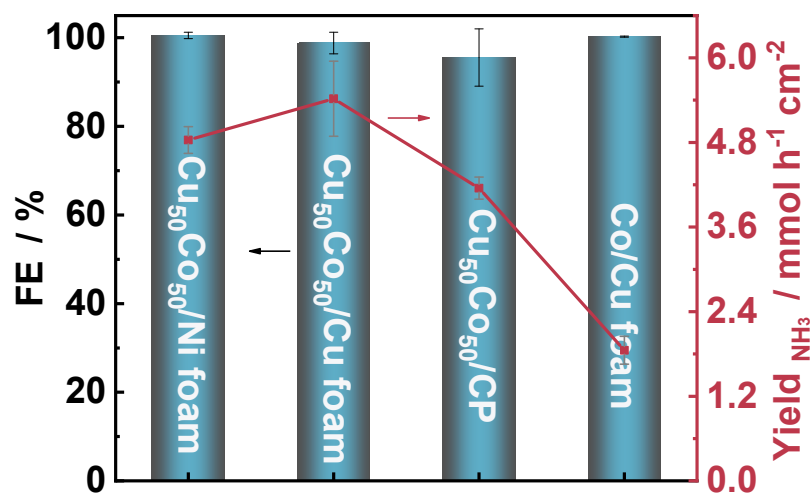

**Supplementary Fig. S25.**  $FE_{\text{NH}_3}$  and product yield rate for  $\text{NH}_3$  on  $\text{Cu}_{50}\text{Co}_{50}/\text{Ni foam}$ ,  $\text{Cu}_{50}\text{Co}_{50}/\text{Cu foam}$ ,  $\text{Cu}_{50}\text{Co}_{50}/\text{CP}$  and  $\text{Co}/\text{Cu foam}$  at  $-0.2 \text{ V vs. RHE}$  in  $100 \text{ mM KNO}_3 + 1 \text{ M KOH}$  electrolyte.

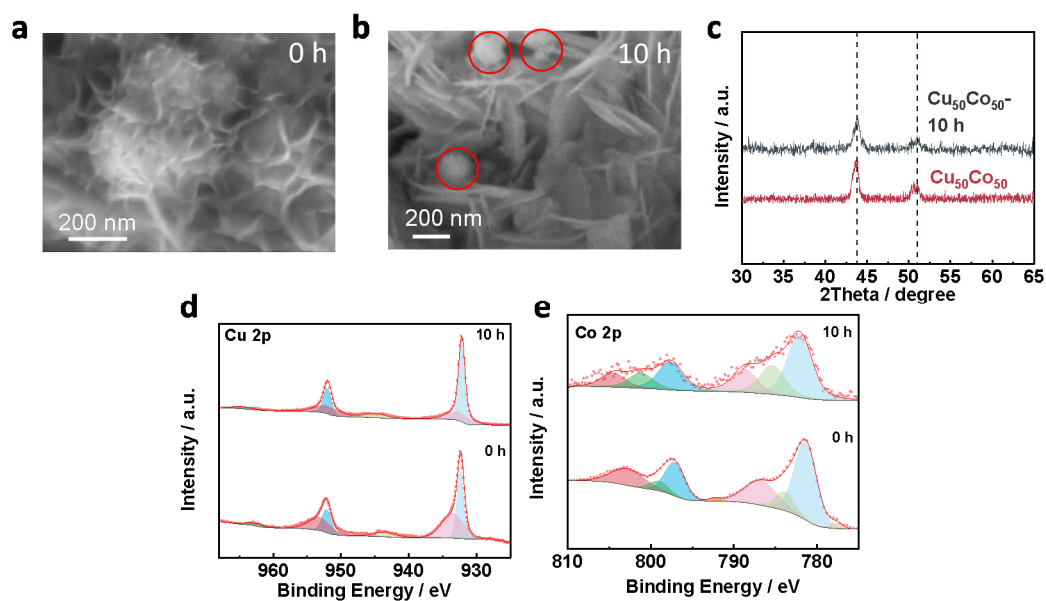

**Supplementary Fig. S26.** The characteristic of  $\text{Cu}_{50}\text{Ni}_{50}$  catalyst after  $\text{NO}_3^-$ RR operation. SEM images of the  $\text{Cu}_{50}\text{Ni}_{50}$  catalyst before (a) and after 10 periods of 1 h (b) electrocatalytic  $\text{NO}_3^-$ RR. XRD spectra (c) and XPS peaks spectra of Cu 2p (d) and Co 2p (e) of  $\text{Cu}_{50}\text{Co}_{50}$  catalyst before and after 10 periods of 1 h  $\text{NO}_3^-$ RR operation at  $-0.2 \text{ V vs. RHE}$ .



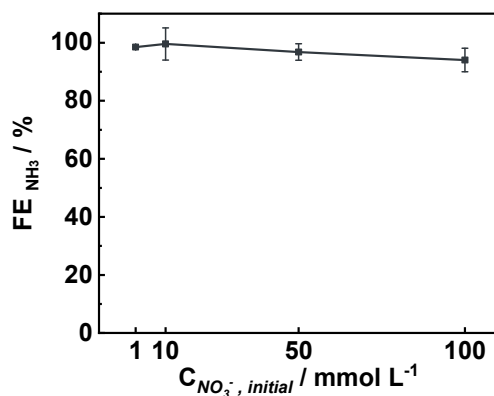

**Supplementary Fig. S27.**  $FE_{NH_3}$  of  $Cu_{50}Co_{50}$  catalyst in different initial  $NO_3^-$  concentrations. The experiment were performed at an electrode potential of -0.1 V vs. RHE in 1 M KOH solutions with initial  $NO_3^-$  concentrations of 1, 10, 50, 100 mM.

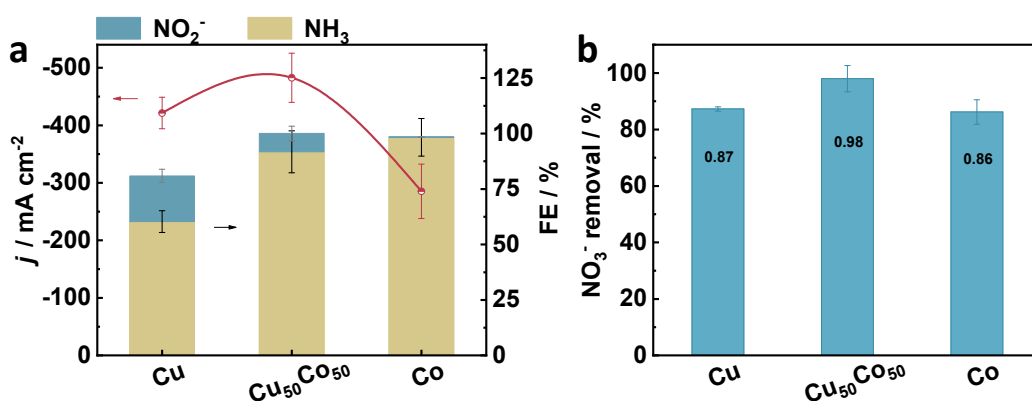

**Supplementary Fig. S28.** The electrochemical performance on Cu,  $Cu_{50}Co_{50}$  and Co catalysts in neutral electrolyte. Current density and  $FE_{NH_3}$  and  $FE_{NO_2^-}$  of  $NO_3^-$ RR in 100 mM  $KNO_3$  + 0.5 M  $K_2SO_4$  neutral electrolyte (a) and  $NO_3^-$  removal rate after 2 hour reduction in 0.1 M  $K_2SO_4$  electrolyte with 200 mg  $NO_3^-$  (b) on Cu,  $Cu_{50}Co_{50}$  and Co catalysts at -0.2 V vs. RHE.

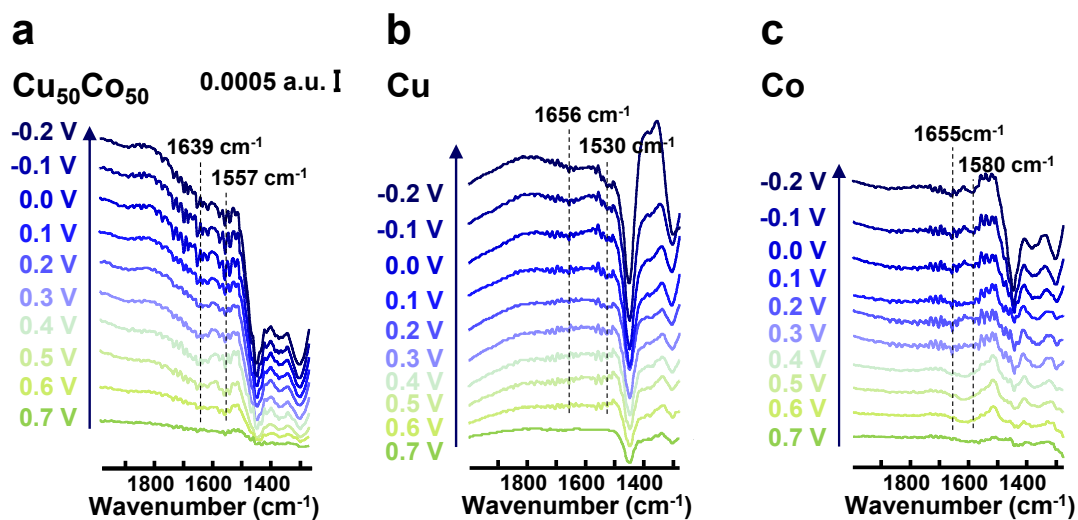

**Supplementary Fig. S29. Electrochemical *in situ* ATR-FTIR spectra of  $\text{NO}_3^-$ RR in  $\text{D}_2\text{O}$ .**  
Spectra on  $\text{Cu}_{50}\text{Co}_{50}$  (a), Cu (b) and Co (c) in electrolyte of 100 mM  $\text{KNO}_3$  + 1 M KOH with  $\text{D}_2\text{O}$  as the solvent.

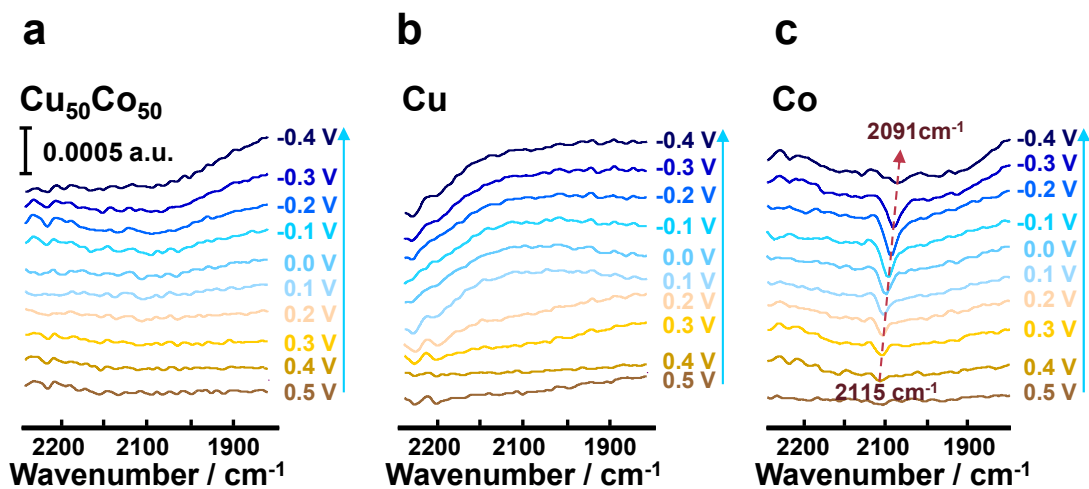

**Supplementary Fig. S30. Electrochemical *in situ* ATR-FTIR spectra of  $\text{NO}_3^-$ RR.** The spectra on  $\text{Cu}_{50}\text{Co}_{50}$  (a), Cu (b) and Co (c) catalysts in 100 mM  $\text{KNO}_3$  + 1M KOH.

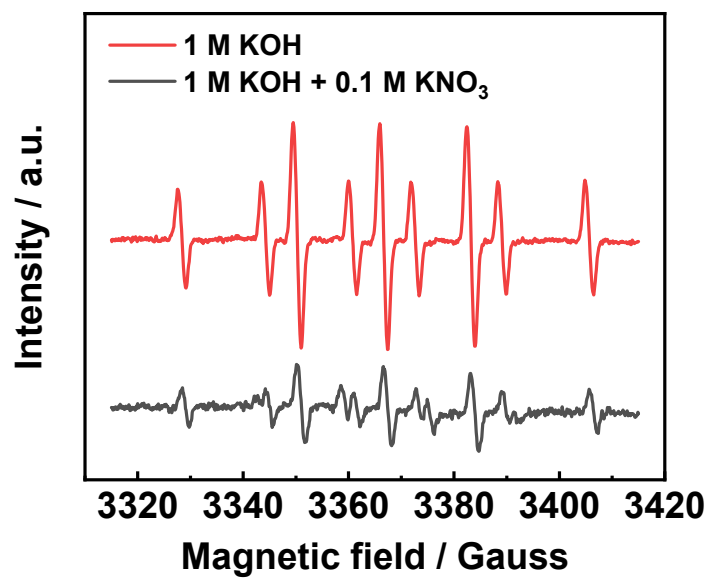

**Supplementary Fig. S31. EPR spectra of DMPO spin-trapping H\*.** The DMPO-H\* stemmed from Cu<sub>50</sub>Co<sub>50</sub> electrodes at -0.4 V vs. RHE in 1 M KOH solution with or without NO<sub>3</sub><sup>-</sup>, respectively.

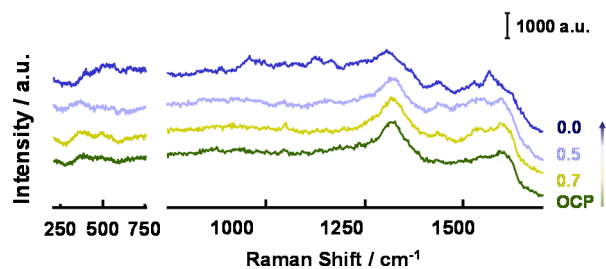

Supplementary Fig. S32. Electrochemical SHINERS spectra of  $\text{NO}_3^-$ RR on  $\text{Au@SiO}_2$ . Spectra between  $230\text{-}750\text{ cm}^{-1}$  and  $750\text{-}1700\text{ cm}^{-1}$  in  $100\text{ mM KNO}_3 + 10\text{ mM KOH}$ .

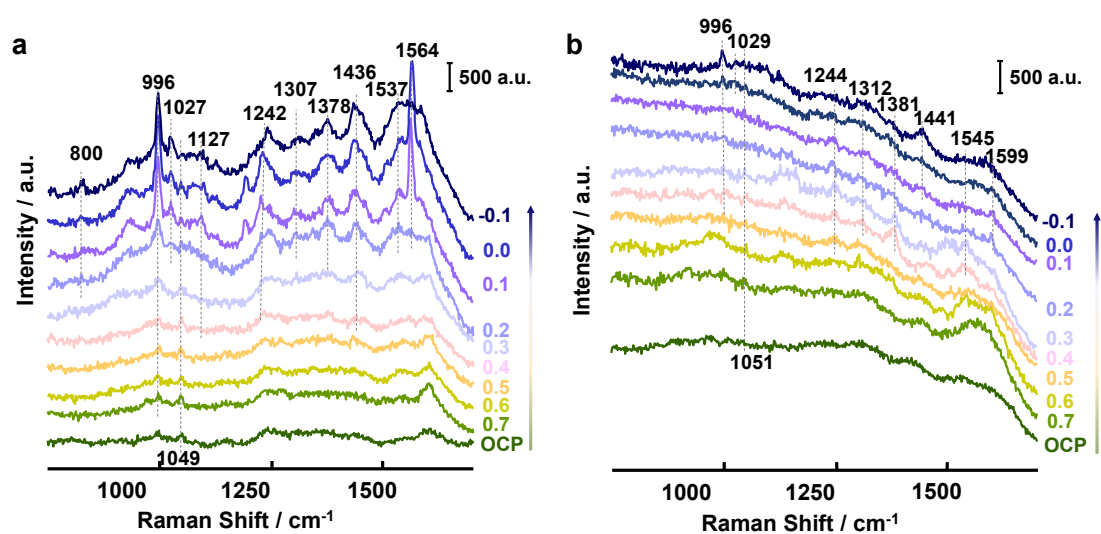

Supplementary Fig. S33. Electrochemical SHINERS spectra of  $\text{NO}_3^-$ RR on Cu and Co catalysts. Spectra between  $750\text{-}1700\text{ cm}^{-1}$  on Cu (a) and Co (b) in  $100\text{ mM KNO}_3 + 10\text{ mM KOH}$  during cathodic polarization from  $0.7\text{ V}$  to  $-0.1\text{ V vs. RHE}$ .

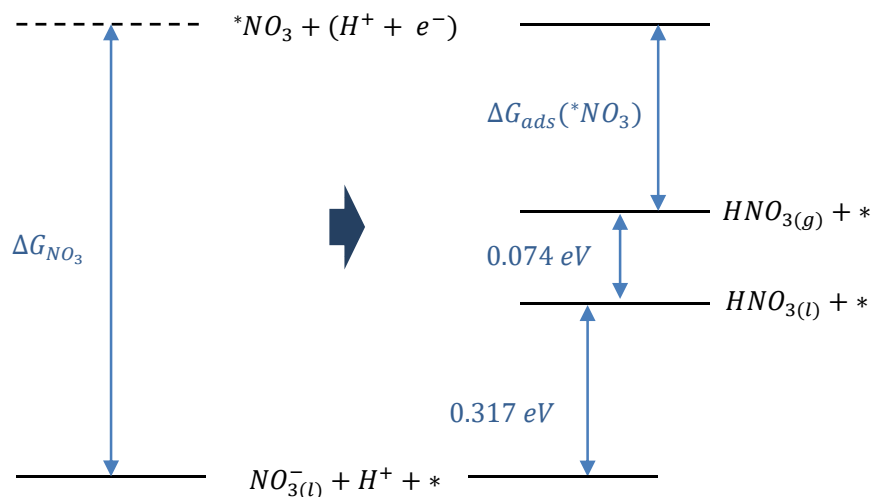

**Supplementary Fig. S34.** The thermodynamic cycle used to calculate the Gibbs free energy of  $NO_3^-$  in the aqueous phase ( $NO_{3(l)}^-$ ) adsorbed onto the electrode surface<sup>2,3</sup>. The thermodynamic values (0.317 eV and 0.074 eV) are obtained from the CRC handbook of chemistry and physics<sup>4</sup>.

## Supplementary Tables

**Supplementary Table S1.** Summary of ICP-OES analysis results for different Cu/Co ratio.

|                                | <b>Cu:Co(%)</b> |
|--------------------------------|-----------------|
|                                | <b>ICP</b>      |
| $\text{Cu}_{65}\text{Co}_{35}$ | 66:34           |
| $\text{Cu}_{50}\text{Co}_{50}$ | 51:49           |
| $\text{Cu}_{15}\text{Co}_{85}$ | 14:86           |

**Supplementary Table S2.** Comparison of the electrocatalytic NO<sub>3</sub><sup>-</sup>RR performances of Cu<sub>50</sub>Co<sub>50</sub> catalysts with other extensively reported electrocatalysts.

| Cathode Material                      | Maximum FE for NH <sub>3</sub> | Bias-Current Density for NH <sub>3</sub> | Maximum NH <sub>3</sub> Production Reported                                                                                           | Conditions                                                                      | Potential            | Ref.             |
|---------------------------------------|--------------------------------|------------------------------------------|---------------------------------------------------------------------------------------------------------------------------------------|---------------------------------------------------------------------------------|----------------------|------------------|
| PA-RhCu cNCs                          | 93.7%                          | -                                        | 0.254 mg cm <sup>-2</sup> h <sup>-1</sup> ,<br>2.40 mg mg <sub>cat</sub> <sup>-1</sup> h <sup>-1</sup>                                | 50 mM KNO <sub>3</sub> ,<br>0.1 M HClO <sub>4</sub>                             | 0.05V vs. RHE        | 5                |
| oxo-MoS <sub>x</sub>                  | 96%                            | -                                        | -                                                                                                                                     | 1006 mM NO <sub>3</sub> <sup>-</sup> ,<br>1 mM PBS                              | 0V vs. RHE           | 6                |
| Cu <sub>50</sub> Ni <sub>50</sub>     | 99%                            | -90 mA cm <sup>-2</sup>                  | -                                                                                                                                     | 100 mM NO <sub>3</sub> <sup>-</sup> ,<br>1 M KOH                                | -0.1V vs. RHE        | 1                |
| Co-NAAs                               | 100.0%                         | -                                        | 4.16 mmol cm <sup>-2</sup> h <sup>-1</sup> ,<br>2.6 mol g <sub>cat</sub> <sup>-1</sup> h <sup>-1</sup>                                | 100 mM NO <sub>3</sub> <sup>-</sup> ,<br>1 M KOH                                | -0.14 V vs. RHE      | 7                |
| Cu-NSs                                | 99.7%                          | -                                        | 390.1 ug <sub>NH3</sub> cm <sup>-2</sup> h <sup>-1</sup> ,<br>390.1 ug <sub>NH3</sub> mg <sub>cat</sub> <sup>-1</sup> h <sup>-1</sup> | 10 mM KNO <sub>3</sub> ,<br>0.1 M KOH                                           | -0.15V vs. RHE       | 8                |
| CuCoSP                                | 93.3%                          | -300 mA cm <sup>-2</sup>                 | 1.17 mol cm <sup>-2</sup> h <sup>-1</sup>                                                                                             | 100 mM NO <sub>3</sub> <sup>-</sup> ,<br>0.1 M KOH                              | -0.175 V vs. RHE     | 9                |
| Ni <sub>3</sub> B@NiB <sub>2.74</sub> | ~ 100%                         | -25mA cm <sup>-2</sup>                   | 0.1983 mmol cm <sup>-2</sup> h <sup>-1</sup>                                                                                          | 100 mM KNO <sub>3</sub> ,<br>0.1 M KOH                                          | -0.2V vs. RHE        | 10               |
| Strained Ru-NCs                       | ~ 100%                         | -120 mA cm <sup>-2</sup>                 | 1.17 mmol cm <sup>-2</sup> h <sup>-1</sup> ,<br>5.56 mol g <sub>cat</sub> <sup>-1</sup> h <sup>-1</sup>                               | 1 M NO <sub>3</sub> <sup>-</sup> ,<br>1 M KOH                                   | -0.2V vs. RHE        | 11               |
| Cu/Cu <sub>2</sub> O NWAs             | 95.8%                          | -                                        | 0.2449 mmol cm <sup>-2</sup> h <sup>-1</sup>                                                                                          | 14.3 mM NO <sub>3</sub> <sup>-</sup> ,<br>0.5 M Na <sub>2</sub> SO <sub>4</sub> | -0.85V vs. SCE       | 12               |
| Rh@Cu                                 | 93.0%                          | -162 mA cm <sup>-2</sup>                 | 1.27 mmol cm <sup>-2</sup> h <sup>-1</sup>                                                                                            | 100 mM NO <sub>3</sub> <sup>-</sup> ,<br>0.1 M Na <sub>2</sub> SO <sub>4</sub>  | -0.2 V vs. RHE       | 13               |
| FOSP-Cu                               | 93.9%                          | -                                        | 101.4 μmol cm <sup>-2</sup> h <sup>-1</sup>                                                                                           | 0.1 M KNO <sub>3</sub> ,<br>0.5 M Na <sub>2</sub> SO <sub>4</sub>               | -0.266 V vs. RHE     | 14               |
| CoO <sub>x</sub>                      | 93.40%                         | -                                        | 0.1723 mmol cm <sup>-2</sup> h <sup>-1</sup> ,<br>82.4 ± 4.8 mg mg <sub>cat</sub> <sup>-1</sup> h <sup>-1</sup>                       | 100 mM KNO <sub>3</sub> ,<br>0.1 M KOH                                          | -0.3 V vs. RHE       | 15               |
| a-RuO <sub>2</sub>                    | 97.5%                          | -                                        | 0.1158 mmol cm <sup>-2</sup> h <sup>-1</sup>                                                                                          | 200 ppm nitrate-N,<br>0.5 M Na <sub>2</sub> SO <sub>4</sub>                     | -0.35 V vs. RHE      | 16               |
| Cu-PTCDA                              | 85.9%                          | -                                        | 0.0256 mmol cm <sup>-2</sup> h <sup>-1</sup>                                                                                          | 36 mM NO <sub>3</sub> <sup>-</sup> ,<br>0.1 mM PBS                              | -0.4V vs. RHE        | 17               |
| TiH <sub>2</sub> /Ti                  | 74.7%                          | -                                        | -                                                                                                                                     | 10 mM HNO <sub>3</sub> ,<br>1 M NaClO <sub>4</sub>                              | -0.8 V vs. RHE       | 18               |
| TiH <sub>2</sub> /Ti                  | 38.0%                          | -                                        | -                                                                                                                                     | 10 mM HNO <sub>3</sub> ,<br>1 M NaClO <sub>4</sub>                              | -0.4 V vs. RHE       | 18               |
| Fe/Ni <sub>2</sub> P                  | 94.30%                         | -                                        | 4.17 mg <sub>NH3</sub> cm <sup>-2</sup> h <sup>-1</sup>                                                                               | 500 mM KNO <sub>3</sub> ,<br>0.1 M K <sub>2</sub> SO <sub>4</sub>               | -0.4 V vs. RHE       | 19               |
| Pd Octohedron                         | 79.9%                          | -                                        | 0.5485 mmol cm <sup>-2</sup> h <sup>-1</sup> ,<br>2.74 mmol mg <sub>cat</sub> <sup>-1</sup> h <sup>-1</sup>                           | 0.1 M NO <sub>3</sub> <sup>-</sup> ,<br>0.1 M Na <sub>2</sub> SO <sub>4</sub>   | -0.7 V vs. RHE       | 20               |
| Fe single atom                        | 75.0%                          | -100 mA cm <sup>-2</sup>                 | 0.46 mmol cm <sup>-2</sup> h <sup>-1</sup> ,<br>20 mmol mg <sub>cat</sub> <sup>-1</sup> h <sup>-1</sup>                               | 500 mM KNO <sub>3</sub> ,<br>0.1 M K <sub>2</sub> SO <sub>4</sub>               | -0.85 V vs. RHE      | 21               |
| TiO <sub>2-x</sub>                    | 85%                            | -                                        | 0.045 mmol cm <sup>-2</sup> h <sup>-1</sup> ,<br>0.045 mmol mg <sub>cat</sub> <sup>-1</sup> h <sup>-1</sup>                           | 3.6 mM NO <sub>3</sub> <sup>-</sup> ,<br>0.5 M Na <sub>2</sub> SO <sub>4</sub>  | -1.6V vs. SCE        | 22               |
| TiO <sub>2</sub>                      | 66.3%                          | -                                        | 0.024 mmol cm <sup>-2</sup> h <sup>-1</sup> ,<br>0.024 mmol mg <sub>cat</sub> <sup>-1</sup> h <sup>-1</sup>                           | 3.6 mM NO <sub>3</sub> <sup>-</sup> ,<br>0.5 M Na <sub>2</sub> SO <sub>4</sub>  | -1.6V vs. SCE        | 22               |
| Ti                                    | 82%                            | -22 mA cm <sup>-2</sup>                  | -                                                                                                                                     | 0.3 mM KNO <sub>3</sub> ,<br>0.1 M HNO <sub>3</sub>                             | -1V vs. RHE          | 23               |
| Pd-NDs/Zr-MOF                         | 58.10%                         | -                                        | 0.1149 mmol cm <sup>-2</sup> h <sup>-1</sup> ,<br>287.31 mmol g <sub>cat</sub> <sup>-1</sup> h <sup>-1</sup>                          | 500 ppm NO <sub>3</sub> <sup>-</sup> ,<br>0.1 M Na <sub>2</sub> SO <sub>4</sub> | -1.3 V vs. RHE       | 24               |
| Cu <sub>50</sub> Co <sub>50</sub>     | <b>51 ± 2 %</b>                | <b>-6 mA cm<sup>-2</sup></b>             | <b>0.029 mmol cm<sup>-2</sup> h<sup>-1</sup>,</b><br><b>5.9 mmol g<sub>cat</sub><sup>-1</sup> h<sup>-2</sup></b>                      | <b>100 mM NO<sub>3</sub><sup>-</sup>,</b><br><b>1 M KOH</b>                     | <b>0.4 V vs. RHE</b> | <b>This work</b> |
|                                       | <b>46 ± 5 %</b>                | <b>-8 mA cm<sup>-2</sup></b>             | <b>0.031 mmol cm<sup>-2</sup> h<sup>-1</sup>,</b><br><b>6.2 mmol g<sub>cat</sub><sup>-1</sup> h<sup>-1</sup></b>                      | <b>100 mM NO<sub>3</sub><sup>-</sup>,</b><br><b>1 M KOH</b>                     | <b>0.3 V vs. RHE</b> |                  |
|                                       | <b>41 ± 1 %</b>                | <b>-9 mA cm<sup>-2</sup></b>             | <b>0.026 mmol cm<sup>-2</sup> h<sup>-1</sup>,</b><br><b>5.2 mmol g<sub>cat</sub><sup>-1</sup> h<sup>-0</sup></b>                      | <b>100 mM NO<sub>3</sub><sup>-</sup>,</b><br><b>1 M KOH</b>                     | <b>0.2 V vs. RHE</b> |                  |
|                                       | <b>65 ± 2 %</b>                | <b>-26 mA cm<sup>-2</sup></b>            | <b>0.08 mmol cm<sup>-2</sup> h<sup>-1</sup>,</b><br><b>16 mmol g<sub>cat</sub><sup>-1</sup> h<sup>-2</sup></b>                        | <b>100 mM NO<sub>3</sub><sup>-</sup>,</b><br><b>1 M KOH</b>                     | <b>0.1 V vs. RHE</b> |                  |

|                  |                                 |                                                                                                           |                                                       |                       |
|------------------|---------------------------------|-----------------------------------------------------------------------------------------------------------|-------------------------------------------------------|-----------------------|
| <b>88 ± 2 %</b>  | <b>-395 mA cm<sup>-2</sup></b>  | <b>1.62 mmol cm<sup>-2</sup> h<sup>-1</sup>,<br/>324 mmol g<sub>cat</sub><sup>-1</sup> h<sup>-1</sup></b> | <b>100 mM NO<sub>3</sub><sup>-</sup>,<br/>1 M KOH</b> | <b>0.0 V vs. RHE</b>  |
| <b>97 ± 5 %</b>  | <b>-942 mA cm<sup>-2</sup></b>  | <b>4.27 mmol cm<sup>-2</sup> h<sup>-1</sup>,<br/>854 mmol g<sub>cat</sub><sup>-1</sup> h<sup>-1</sup></b> | <b>100 mM NO<sub>3</sub><sup>-</sup>,<br/>1 M KOH</b> | <b>-0.1 V vs. RHE</b> |
| <b>100 ± 1 %</b> | <b>-1035 mA cm<sup>-2</sup></b> | <b>4.83 mmol cm<sup>-2</sup> h<sup>-1</sup>,<br/>960 mmol g<sub>cat</sub><sup>-1</sup> h<sup>-1</sup></b> | <b>100 mM NO<sub>3</sub><sup>-</sup>,<br/>1 M KOH</b> | <b>-0.2 V vs. RHE</b> |
| <b>98 ± 3 %</b>  | <b>-1064 mA cm<sup>-2</sup></b> | <b>4.87 mmol cm<sup>-2</sup> h<sup>-1</sup>,<br/>974 mmol g<sub>cat</sub><sup>-1</sup> h<sup>-1</sup></b> | <b>100 mM NO<sub>3</sub><sup>-</sup>,<br/>1 M KOH</b> | <b>-0.3 V vs. RHE</b> |
| <b>90 ± 6 %</b>  | <b>-1098 mA cm<sup>-2</sup></b> | <b>4.58 mmol cm<sup>-2</sup> h<sup>-1</sup>,<br/>916 mmol g<sub>cat</sub><sup>-1</sup> h<sup>-1</sup></b> | <b>100 mM NO<sub>3</sub><sup>-</sup>,<br/>1 M KOH</b> | <b>-0.4 V vs. RHE</b> |



**Supplementary Table S3.** FTIR peaks for the *in situ* NO<sub>3</sub><sup>-</sup>RR on Cu<sub>50</sub>Co<sub>50</sub>, Cu and Co catalysts.

| Wavenumber / cm <sup>-1</sup>     |      |           |                                                      | reference |
|-----------------------------------|------|-----------|------------------------------------------------------|-----------|
| Cu <sub>50</sub> Co <sub>50</sub> | Cu   | Co        | Assignment                                           |           |
| 1110                              | 1123 | 1110      | v <sub>s</sub> (N-O) of NH <sub>2</sub> OH           | 25,26     |
| 1236                              | 1235 | -         | v <sub>a</sub> (N-O) of NO <sub>2</sub> <sup>-</sup> | 25        |
| 1354                              | 1354 | 1353      | v <sub>a</sub> (N-O) of NO <sub>3</sub> <sup>-</sup> | 27        |
| 1392                              | 1392 | 1393      | v <sub>s</sub> (N-O) of NO <sub>3</sub> <sup>-</sup> | 27        |
| 1557                              | 1530 | 1580      | v(N-O) of bridge bonded NO <sub>ad</sub>             | 27,28     |
| 1639                              | 1656 | 1655      | v(N-O) of on-top bonded NO <sub>ad</sub>             | 27,28     |
| 1638                              | 1638 | 1633      | δ(HOH) of H <sub>2</sub> O                           | 29        |
| 2109-2085                         | -    | 2115-2092 | v(Co-H)                                              | 30,31     |

**Supplementary Table S4.** Raman scattering peaks for *in situ* nitrates reduction on Cu<sub>50</sub>Co<sub>50</sub>, Cu and Co catalysts.

| Ramam shift / cm <sup>-1</sup>    |      |      |                                                                                      | reference |
|-----------------------------------|------|------|--------------------------------------------------------------------------------------|-----------|
| Cu <sub>50</sub> Co <sub>50</sub> | Cu   | Co   | Assignment                                                                           |           |
| 431                               | 427  | -    | Cu-O <sub>x</sub>                                                                    | 32        |
| 568                               | -    | 568  | Co-O <sub>x</sub>                                                                    | 33        |
| 625                               | 625  | -    | Cu <sub>2</sub> O                                                                    | 34        |
| 714                               | 714  | -    | Cu-OH <sub>ad</sub>                                                                  | 32,35     |
| -                                 | 800  | -    | NO <sub>2</sub> <sup>-</sup> bending                                                 | 36        |
| 998                               | 996  | 996  | ν(NO) of unidentate nitrate                                                          | 37        |
| 1028                              | 1027 | 1029 | ν <sub>s</sub> (NO <sub>3</sub> <sup>-</sup> ) adsorbed NO <sub>3</sub> <sup>-</sup> | 38        |
| 1049                              | 1049 | 1051 | ν <sub>s</sub> (NO <sub>3</sub> <sup>-</sup> )                                       | 39        |
| 1125                              | 1127 | 1127 | ν <sub>s</sub> NO <sub>2</sub> <sup>-</sup> , chelating nitrito                      | 40        |
| 1254                              | 1242 | 1244 | ν <sub>a</sub> NO <sub>2</sub> <sup>-</sup> , chelating nitrito                      | 40        |
| 1315                              | 1307 | 1312 | δ <sub>s</sub> (HNH) deformation                                                     | 38,41     |
| 1374                              | 1378 | 1381 | δ <sub>s</sub> (HNH) deformation                                                     | 38,41     |
| 1439                              | 1436 | 1441 | ν(N=O), bridging nitro                                                               | 41        |
| 1540                              | 1537 | 1545 | ν(N=O) of HNO                                                                        | 42        |
| 1591                              | 1564 | 1599 | δ <sub>a</sub> (HNH) of NH <sub>3</sub>                                              | 43        |

**Supplementary Table S5.** The electronic energies (E), zero-point energies (ZPE) and entropy (TS) corrections for H<sub>2</sub>O<sub>(l)</sub>, H<sub>2</sub><sub>(g)</sub>, NH<sub>3</sub><sub>(g)</sub> and HNO<sub>3</sub><sub>(g)</sub> used in the Gibbs free energy calculations. The data marked in bold are cited from CRC handbook of chemistry and physics.<sup>4</sup> (*T* = 298.15 K, *p*<sub>gas</sub> = 1 atm).

| Molecule                        | E / eV | ZPE / eV | TS / eV | TS(CRC handbook) / eV |
|---------------------------------|--------|----------|---------|-----------------------|
| H <sub>2</sub> O <sub>(l)</sub> | -14.22 | 0.57     | 0.67    | \                     |
| H <sub>2</sub> <sub>(g)</sub>   | -6.77  | 0.27     | 0.40    | <b>0.40</b>           |
| NH <sub>3</sub> <sub>(g)</sub>  | -19.54 | 0.91     | 0.60    | <b>0.60</b>           |
| HNO <sub>3</sub> <sub>(g)</sub> | -28.61 | 0.69     | 0.83    | <b>0.82</b>           |

**Supplementary Table S6.** Adsorption configurations of  $^*\text{NO}_3$ ,  $^*\text{NO}_2$ ,  $\text{NO}$ ,  $^*\text{NOH}$ ,  $^*\text{NHOH}$ ,  $^*\text{NH}_2\text{OH}$ ,  $^*\text{NH}_2$  and  $^*\text{NH}_3$  on Cu(111), CuCo(111), Co(111) surfaces.

|                          | Cu                                                                                  | CuCo                                                                                | Co                                                                                    |
|--------------------------|-------------------------------------------------------------------------------------|-------------------------------------------------------------------------------------|---------------------------------------------------------------------------------------|
| $^*\text{NO}_3$          | 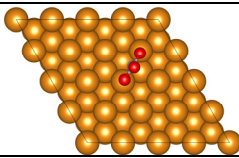   |    |    |
| $^*\text{NO}_2$          |    |    |    |
| $\text{NO}$              |    |    |    |
| $^*\text{NOH}$           |    |    |    |
| $^*\text{NHOH}$          |   |   |   |
| $^*\text{NH}_2\text{OH}$ |  |  |  |
| $^*\text{NH}_2$          |  |  |  |
| $^*\text{NH}_3$          |  |  |  |

**Supplementary Table S7.** The correction of zero-point energy (ZPE) of adsorption species on different catalysts' surfaces (in eV). All the slab atoms were fixed during the vibrational analyses.

|                     | Cu(111) | Co(111) | CuCo(111) |
|---------------------|---------|---------|-----------|
| *NO <sub>3</sub>    | 0.39    | 0.40    | 0.40      |
| *NO <sub>2</sub>    | 0.26    | 0.27    | 0.26      |
| *NO                 | 0.16    | 0.17    | 0.19      |
| *NOH                | 0.46    | 0.45    | 0.46      |
| *NHOH               | 0.78    | 0.77    | 0.77      |
| *NH <sub>2</sub> OH | 1.10    | 1.11    | 1.10      |
| *NH <sub>2</sub>    | 0.67    | 0.68    | 0.67      |
| *NH <sub>3</sub>    | 0.99    | 1.01    | 1.01      |
| *H                  | 0.17    | 0.17    | 0.18      |

**Supplementary Table S8.** The correction of entropy (TS) of adsorption species on different catalysts' surfaces (in eV). All the slab atoms were fixed during the vibrational analyses. (T = 298.15 K)

|                     | Cu(111) | Co(111) | CuCo(111) |
|---------------------|---------|---------|-----------|
| *NO <sub>3</sub>    | 0.23    | 0.27    | 0.26      |
| *NO <sub>2</sub>    | 0.24    | 0.20    | 0.22      |
| *NO                 | 0.14    | 0.12    | 0.17      |
| *NOH                | 0.16    | 0.16    | 0.15      |
| *NHOH               | 0.15    | 0.14    | 0.15      |
| *NH <sub>2</sub> OH | 0.21    | 0.19    | 0.25      |
| *NH <sub>2</sub>    | 0.10    | 0.09    | 0.09      |
| *NH <sub>3</sub>    | 0.14    | 0.17    | 0.12      |
| *H                  | 0.00    | 0.00    | 0.00      |

**Supplementary Table S9.** Calculated electronic energies (E) of adsorption species on different catalysts' surfaces (in eV).

|                     | Cu(111) | Co(111) | CuCo(111) |
|---------------------|---------|---------|-----------|
| *                   | -162.86 | -317.95 | -233.09   |
| *NO <sub>3</sub>    | -188.29 | -343.62 | -258.94   |
| *NO <sub>2</sub>    | -182.66 | -338.01 | -252.94   |
| *NO                 | -176.57 | -332.66 | -247.60   |
| *NOH                | -179.97 | -335.96 | -251.05   |
| *NHOH               | -183.84 | -339.45 | -254.66   |
| *NH <sub>2</sub> OH | -187.60 | -342.90 | -258.09   |
| *NH <sub>2</sub>    | -178.82 | -334.23 | -249.18   |
| *NH <sub>3</sub>    | -182.92 | -338.19 | -253.36   |
| *H                  | -166.57 | -321.82 | -236.97   |

**Supplementary Table S10.** Calculated Gibbs free energies ( $\Delta G$ ) of adsorption species for NO<sub>3</sub><sup>-</sup> RR on different catalysts' surfaces with respect to the reference NO<sub>3</sub><sup>-</sup>(l) + \* (in eV).

|                                                   | Cu(111) |            | Co(111) |            | CuCo(111) |            |
|---------------------------------------------------|---------|------------|---------|------------|-----------|------------|
|                                                   | U = 0 V | U = -0.2 V | U = 0 V | U = -0.2 V | U = 0 V   | U = -0.2 V |
| Reference<br>NO <sub>3</sub> <sup>-</sup> (l) + * | 0       | 0          | 0       | 0          | 0         | 0          |
| $\Delta G(*NO_3)$                                 | 0.41    | 0.61       | 0.14    | 0.34       | -0.03     | 0.17       |
| $\Delta G(*NO_2)$                                 | -1.50   | -1.70      | -1.72   | -1.92      | -1.54     | -1.74      |
| $\Delta G(*NO)$                                   | -2.83   | -3.43      | -3.80   | -4.40      | -3.63     | -4.23      |
| $\Delta G(*NOH)$                                  | -2.49   | -3.29      | -3.41   | -4.21      | -3.33     | -4.13      |
| $\Delta G(*NHOH)$                                 | -2.58   | -3.58      | -3.10   | -4.10      | -3.18     | -4.18      |
| $\Delta G(*NH_2OH)$                               | -2.63   | -3.83      | -2.81   | -4.01      | -2.93     | -4.13      |
| $\Delta G(*NH_2)$                                 | -5.03   | -6.43      | -5.34   | -6.74      | -5.16     | -6.56      |
| $\Delta G(*NH_3)$                                 | -5.39   | -6.99      | -5.60   | -7.20      | -5.58     | -7.18      |
| $\Delta G(NH_3)$                                  | -5.42   | -7.02      | -5.42   | -7.02      | -5.42     | -7.02      |

**Supplementary Table S11.** Calculated Gibbs free energies ( $\Delta G$ ) of adsorption species for HER on different catalysts' surfaces with respect to the reference of  $H^+ + e^- + *$  (in eV).

|                           | Cu(111) |            | Co(111) |            | CuCo(111) |            |
|---------------------------|---------|------------|---------|------------|-----------|------------|
|                           | U = 0 V | U = -0.2 V | U = 0 V | U = -0.2 V | U = 0 V   | U = -0.2 V |
| Reference $H^+ + e^- + *$ | 0       | 0          | 0       | 0          | 0         | 0          |
| $\Delta G(*H)$            | -0.08   | -0.28      | -0.25   | -0.45      | -0.25     | -0.45      |

**Supplementary Table S12.** top view and side view of Cu(111), Co(111) and CuCo(111) with different surface exposure structures and the corresponding adsorption configuration of \*NO<sub>3</sub> and \*NO<sub>2</sub>

| slab             | top view  | Cu | CuCo | CuCo-1 | CuCo-2 | CuCo-3 | CuCo-4 | CuCo-5 | Co |  |  |  |  |  |  |  |
|------------------|-----------|----|------|--------|--------|--------|--------|--------|----|--|--|--|--|--|--|--|
|                  | side view |    |      |        |        |        |        |        |    |  |  |  |  |  |  |  |
| *NO <sub>3</sub> |           |    |      |        |        |        |        |        |    |  |  |  |  |  |  |  |
| *NO <sub>2</sub> |           |    |      |        |        |        |        |        |    |  |  |  |  |  |  |  |

**Supplementary Table S13.** Calculated Gibbs free energies (in eV) of \*NO<sub>3</sub> and \*NO<sub>2</sub> on Cu(111), Co(111) and CuCo(111) with different surface exposure structures at 0 V vs. RHE.

|                                                   | Cu    | CuCo  | CuCo-1 | CuCo-2 | CuCo-3 | CuCo-4 | CuCo-5 | Co    |
|---------------------------------------------------|-------|-------|--------|--------|--------|--------|--------|-------|
| Reference<br>NO <sub>3</sub> <sup>-</sup> (l) + * | 0     | 0     | 0      | 0      | 0      | 0      | 0      | 0     |
| ΔG(*NO <sub>3</sub> )                             | 0.41  | -0.03 | 0.33   | 0.30   | 0.30   | 0.10   | 0.22   | 0.14  |
| ΔG(*NO <sub>2</sub> )                             | -1.50 | -1.54 | -1.41  | -1.53  | -1.57  | -1.76  | -1.66  | -1.72 |

**Supplementary Table S14.** Calculated Gibbs free energies (in eV) of \*NO<sub>3</sub> and \*NO<sub>2</sub> on Cu(111), Co(111) and CuCo(111) with different surface exposure structures at -0.2 V vs. RHE.

|                                                   | Cu    | CuCo  | CuCo-1 | CuCo-2 | CuCo-3 | CuCo-4 | CuCo-5 | Co    |
|---------------------------------------------------|-------|-------|--------|--------|--------|--------|--------|-------|
| Reference<br>NO <sub>3</sub> <sup>-</sup> (l) + * | 0     | 0     | 0      | 0      | 0      | 0      | 0      | 0     |
| ΔG(*NO <sub>3</sub> )                             | 0.61  | 0.17  | 0.53   | 0.50   | 0.50   | 0.30   | 0.42   | 0.34  |
| ΔG(*NO <sub>2</sub> )                             | -1.70 | -1.74 | -1.61  | -1.73  | -1.77  | -1.96  | -1.86  | -1.92 |



## Supplementary Notes.

### Supplementary Note S1. Details of DFT calculations.

1. The Gibbs free energy of  $\text{NO}_3^-$  adsorption onto the electrode surface.

At 0 V vs. RHE,  $\text{H}^+ + \text{e}^- \rightleftharpoons \frac{1}{2}\text{H}_2$  is in equilibrium at  $p_{\text{H}_2} = 1 \text{ atm}$  (Eq. (S1) and (S2)).

$$G(\text{H}^+) + G(\text{e}^-) = \frac{1}{2}G(\text{H}_2) \quad (\text{S1})$$

$$G(\text{OH}^-) = G(\text{H}_2\text{O}) - \frac{1}{2}G(\text{H}_2) \quad (\text{S2})$$

The process of  $\text{NO}_3^-$  adsorbed onto the electrode surface (Eq. (S3)) was divided into three steps (Eqs. (S4-S6)), as shown in **Supplementary Fig. S34**<sup>2,3</sup>.

Firstly, the Gibbs free energy for  $\text{HNO}_3$  formation from  $\text{NO}_3^-$  is 0.317 eV (Eq. (S4)). The change in Gibbs free energy of the vaporization of  $\text{HNO}_3$  was then calculated from the Gibbs free energy difference between the standard formation of  $\text{HNO}_3$  in liquid ( $\text{HNO}_3(\text{l})$ ) (-0.836 eV) and gas phase ( $\text{HNO}_3(\text{g})$ ) (-0.762 eV) and was equal to 0.074 eV (Eq. (S5)). The Gibbs free energy of  $\text{NO}_3$  adsorption on the surface ( $^*\text{NO}_3$ ) (Eq.(S6)), following the Eq. (S7).

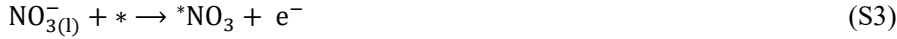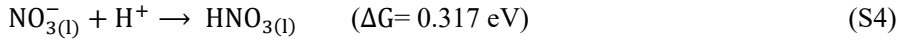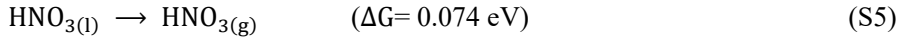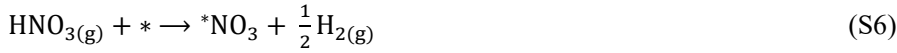

$$\Delta G_{\text{ads}}(^*\text{NO}_3) = G(^*\text{NO}_3) + \frac{1}{2}G_{\text{gas}}(\text{H}_2) - G(*) - G_{\text{gas}}(\text{HNO}_3) \quad (\text{S7})$$

Ultimately, the overall Gibbs free energy change ( $\Delta G_{* \text{NO}_3}$ ) for  $\text{NO}_3^-$  adsorption from the solution phase on to electrode surface ( $\text{NO}_3^- + * \rightarrow ^*\text{NO}_3 + \text{e}^-$ ) was calculated following Eq. (S8):

$$\Delta G_{* \text{NO}_3} = \Delta G_{\text{ads}}(^*\text{NO}_3) + 0.074 \text{ eV} + 0.317 \text{ eV} - eU$$

$$= G(^*\text{NO}_3) + \frac{1}{2}G_{\text{gas}}(\text{H}_2) - G(*) - G_{\text{gas}}(\text{HNO}_3) + 0.391 \text{ eV} - eU$$

$$= E(^*\text{NO}_3) + \text{ZPE}(^*\text{NO}_3) - \text{TS}(^*\text{NO}_3) + \frac{1}{2}[(E_{\text{gas}}(\text{H}_2) + \text{ZPE}_{\text{gas}}(\text{H}_2) - \text{TS}_{\text{gas}}(\text{H}_2)] -$$

$$E(*) - E_{\text{gas}}(\text{HNO}_3) - \text{ZPE}_{\text{gas}}(\text{HNO}_3) + \text{TS}_{\text{gas}}(\text{HNO}_3) + 0.391 \text{ eV} - eU \quad (\text{S8})$$

Here we neglected the ZPE and rotational, translational, and vibrational free energy contributions for slab (i.e.,  $G(*) = E(*)$ ).<sup>2</sup> The U is the potential at the electrode and e is the transferred charge.

2. The  $\text{NO}_3^-$ RR on different catalysts surfaces were simulated according to the following reactions<sup>44</sup>:

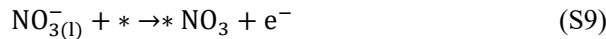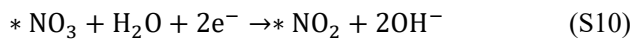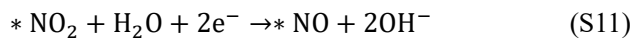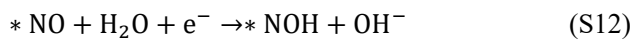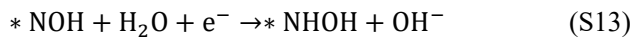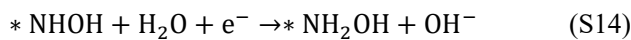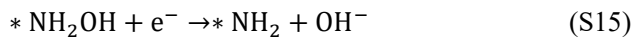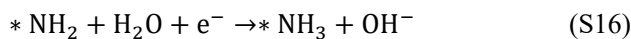

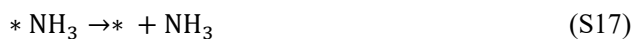

Where the \* represents the active sites.

For each subsequent reaction, the free energies were given after gas correction, following Eq. (S18):

$$\Delta G = \Delta E + \Delta \text{ZPE} - T\Delta S - eU \quad (\text{S18})$$

where  $\Delta E$  is the energy obtained by the difference between reactant and product,  $\Delta \text{ZPE}$  denotes the change of zero-point energy.  $\Delta S$  is the change in entropy for each reaction. The entropies of adsorbate and adsorption site are negligible. Here,  $U$  is the potential at the electrode and  $e$  is the transferred charge.

**Supplementary Note S2. The reference used in the Gibbs free energy calculations.** In the thermodynamic calculation, the energy of negatively charged species like  $\text{NO}_3^-$  and  $\text{OH}^-$  are difficult to determine. However, they can be approached using the stable molecules  $\text{HNO}_3$  and  $\text{H}_2$  in the gas phase ( $\text{HNO}_3(\text{g})$  and  $\text{H}_2(\text{g})$ ) and liquid  $\text{H}_2\text{O}$  ( $\text{H}_2\text{O}(\text{l})$ ) instead. The  $\text{HNO}_3(\text{g})$ ,  $\text{H}_2\text{O}(\text{l})$ ,  $\text{H}_2(\text{g})$  and a clean slab are used as references when calculating the Gibbs free energies of reaction intermediates. The zero-point energies (ZPE) and entropy (TS) (in eV) corrections for Gibbs free energy calculations of  $\text{HNO}_3(\text{g})$ ,  $\text{H}_2\text{O}(\text{l})$ ,  $\text{NH}_3(\text{g})$  and  $\text{H}_2(\text{g})$  were obtained through vibrational analyses. The calculated TS were close to the data cited from CRC handbook of chemistry and physics<sup>4</sup>, as shown in **Supplementary Table S5**.

**Supplementary Note S3. The initial data calculated for the Gibbs free energy calculations.** The correction of zero-point energy (ZPE), entropy (TS) and calculated electronic energies (E) of the intermediates involved in  $\text{NO}_3^-$ RR on Cu(111), Co(111) and CuCo(111) surfaces were listed in the **Supplementary Table S7**, **Supplementary Table S8** and **Supplementary Table S9**, respectively. All the slab atoms were fixed during the vibrational analyses. ( $T = 298.15 \text{ K}$ )

**Supplementary Note S4. Stable configurations of the intermediates on different CuCo surface models.** To study the adsorption mode of intermediate species and active sites, we studied the process of  $* + \text{NO}_3^- \rightarrow * \text{NO}_3 \rightarrow * \text{NO}_2$  on the 6 different CuCo modes, since  $* + \text{NO}_3^- \rightarrow * \text{NO}_3$  is the rate-determining step. For the reason of computing resources limitation, the following processes were omitted. The models were shown below (**Supplementary Table S12**). The Gibbs free energies of  $* \text{NO}_3$  and  $* \text{NO}_2$  on Cu(111), Co(111) and CuCo(111) with a different arrangement of surface atoms, denoted as CuCo and CuCo1 to 5, were calculated and presented in **Supplementary Table S13 and S14**. The atom's arrangement on the first layer of the alloy directly affects the adsorption of intermediates. We first compared the  $\Delta G (* \text{NO}_3)$  of Cu and CuCo-1, which had the same surface composition and active sites for adsorption. The  $\Delta G (* \text{NO}_3)$  on CuCo-1 was slightly lower than that on Cu, indicating that the alloying between Cu and Co benefits the  $\text{NO}_3^-$ RR. As the appearance and gradually increase of Co atoms ratio in the first layer (CuCo-2, 3, 4 and CuCo), the  $\Delta G (* \text{NO}_3)$  required for  $\text{NO}_3^-$  adsorption gradually decreased from 0.53 eV to 0.17 eV in the case of -0.2 V and from 0.33 eV to -0.03 eV in the case of 0.0 V. It demonstrated that the surface layer element composition significantly affected the adsorption mode. However, it should be noted

that when the surface layer composes only Co atoms, the adsorption energy of  $\text{NO}_3^-$  will increase. The trend was consistent with the experimental result that  $\eta_{10 \text{ mA cm}^{-2}}$  of  $\text{NO}_3^-$ RR on Co catalyst was 690 mV that is more negative than on  $\text{Cu}_{50}\text{Co}_{50}$  catalyst ( $\eta_{10 \text{ mA cm}^{-2}}$  of 498 mV) (**Fig. 2a** in the manuscript). It should be mentioned that a dramatically higher  $j_{\text{NH}_3}$  was obtained on  $\text{Cu}_{50}\text{Co}_{50}$  catalyst at 0.0 V ( $347 \text{ mA cm}^{-2}$ ) compared to Cu catalyst ( $34 \text{ mA cm}^{-2}$ ) and Co catalyst ( $21 \text{ mA cm}^{-2}$ ) alone (**Supplementary Fig. S24a**). The CuCo model provided more consistent results of DFT calculation with the above experimental results. Therefore, we selected the CuCo model for subsequent analysis to explain the difference between the  $\text{Cu}_{50}\text{Co}_{50}$  alloy and the pure Cu and Co metal catalysts.

## References for Supplementary Information.

- 1 Wang, Y. *et al.* Enhanced Nitrate-to-Ammonia Activity on Copper-Nickel Alloys via Tuning of Intermediate Adsorption. *J. Am. Chem. Soc.* **142**, 5702-5708 (2020).
- 2 Liu, J.-X., Richards, D., Singh, N. & Goldsmith, B. R. Activity and Selectivity Trends in Electrocatalytic Nitrate Reduction on Transition Metals. *ACS Catal.* **9**, 7052-7064 (2019).
- 3 Calle-Vallejo, F., Huang, M., Henry, J., Koper, M. T. M. & Bandarenka, A. S. Theoretical design and experimental implementation of Ag/Au electrodes for the electrochemical reduction of nitrate. *Physical chemistry chemical physics : PCCP* **15** **9**, 3196-3202 (2013).
- 4 Lide, D. R. *CRC Handbook of Chemistry and Physics*. (CRC Press, Boca Raton, FL, 2009).
- 5 Ge, Z. X. *et al.* Interfacial Engineering Enhances the Electroactivity of Frame-Like Concave RhCu Bimetallic Nanocubes for Nitrate Reduction. *Adv. Energy Mater.* (2022).
- 6 Li, Y. *et al.* Enzyme Mimetic Active Intermediates for Nitrate Reduction in Neutral Aqueous Media. *Angew. Chem. Int. Ed.* **59**, 9744-9750 (2020).
- 7 Deng, X., Yang, Y., Wang, L., Fu, X. Z. & Luo, J. L. Metallic Co Nanoarray Catalyzes Selective NH<sub>3</sub> Production from Electrochemical Nitrate Reduction at Current Densities Exceeding 2 A cm<sup>-2</sup>. *Adv. Sci.* **8**, 2004523 (2021).
- 8 Fu, X. *et al.* Alternative route for electrochemical ammonia synthesis by reduction of nitrate on copper nanosheets. *Appl. Mater. Today* **19** (2020).
- 9 He, W. *et al.* Splicing the active phases of copper/cobalt-based catalysts achieves high-rate tandem electroreduction of nitrate to ammonia. *Nat. Commun.* **13**, 1129 (2022).
- 10 Li, L. *et al.* Efficient Nitrogen Fixation to Ammonia through Integration of Plasma Oxidation with Electrocatalytic Reduction. *Angew. Chem. Int. Ed.* **60**, 14131-14137 (2021).
- 11 Li, J. *et al.* Efficient Ammonia Electrosynthesis from Nitrate on Strained Ruthenium Nanoclusters. *J. Am. Chem. Soc.* **142**, 7036-7046 (2020).
- 12 Wang, Y., Zhou, W., Jia, R., Yu, Y. & Zhang, B. Unveiling the Activity Origin of a Copper-based Electrocatalyst for Selective Nitrate Reduction to Ammonia. *Angew. Chem. Int. Ed.* **59**, 5350-5354 (2020).
- 13 Liu, H. *et al.* Efficient Electrochemical Nitrate Reduction to Ammonia with Copper-Supported Rhodium Cluster and Single-Atom Catalysts. *Angew. Chem. Int. Ed.* **61**, e202202556 (2022).
- 14 Zhao, Y. *et al.* Flower-like open-structured polycrystalline copper with synergistic multi-crystal plane for efficient electrocatalytic reduction of nitrate to ammonia. *Nano Energy* **97** (2022).
- 15 Wang, J. *et al.* Electrocatalytic Reduction of Nitrate to Ammonia on Low-Cost Ultrathin CoO<sub>x</sub> Nanosheets. *ACS Catal.* **11**, 15135-15140 (2021).
- 16 Wang, Y. *et al.* Structurally Disordered RuO<sub>2</sub> Nanosheets with Rich Oxygen Vacancies for Enhanced Nitrate Electroreduction to Ammonia. *Angew. Chem. Int. Ed.* **61**, e202202604 (2022).
- 17 Chen, G.-F. *et al.* Electrochemical reduction of nitrate to ammonia via direct eight-electron transfer using a copper-molecular solid catalyst. *Nat. Energy* **5**, 605-613 (2020).
- 18 Liu, M. J. *et al.* Catalytic Performance and Near-Surface X-ray Characterization of Titanium Hydride Electrodes for the Electrochemical Nitrate Reduction Reaction. *J. Am. Chem. Soc.* **144**, 5739-5744 (2022).
- 19 Zhang, R. *et al.* Efficient Ammonia Electrosynthesis and Energy Conversion through a Zn-Nitrate Battery by Iron Doping Engineered Nickel Phosphide Catalyst. *Adv. Energy Mater.* **12**

(2022).

20 Han, Y. *et al.* Facet-controlled palladium nanocrystalline for enhanced nitrate reduction towards ammonia. *J. Colloid Interface Sci.* **600**, 620-628 (2021).

21 Wu, Z. Y. *et al.* Electrochemical ammonia synthesis via nitrate reduction on Fe single atom catalyst. *Nat. Commun.* **12**, 2870 (2021).

22 Jia, R. *et al.* Boosting Selective Nitrate Electroreduction to Ammonium by Constructing Oxygen Vacancies in TiO<sub>2</sub>. *ACS Catal.* **10**, 3533-3540 (2020).

23 McEnaney, J. M. *et al.* Electrolyte Engineering for Efficient Electrochemical Nitrate Reduction to Ammonia on a Titanium Electrode. *ACS Sustain. Chem. Eng.* **8**, 2672-2681 (2020).

24 Jiang, M. *et al.* Interfacial Reduction Nucleation of Noble Metal Nanodots on Redox-Active Metal-Organic Frameworks for High-Efficiency Electrocatalytic Conversion of Nitrate to Ammonia. *Nano Lett.* **22**, 2529-2537 (2022).

25 Pérez-Gallent, E., Figueiredo, M. C., Katsounaros, I. & Koper, M. T. M. Electrocatalytic reduction of Nitrate on Copper single crystals in acidic and alkaline solutions. *Electrochim. Acta* **227**, 77-84 (2017).

26 Rosca, V., Beltramo, G. L. & Koper, M. T. M. Hydroxylamine electrochemistry at polycrystalline platinum in acidic media: a voltammetric, DEMS and FTIR study. *J. Electroanal. Chem.* **566**, 53-62 (2004).

27 Figueiredo, M. C., Souza-Garcia, J., Climent, V. & Feliu, J. M. Nitrate reduction on Pt(111) surfaces modified by Bi adatoms. *Electrochem. commun.* **11**, 1760-1763 (2009).

28 Agrawal, V. K. & Trenary, M. An infrared study of NO adsorption at defect sites on Pt(111). *Surf. Sci.* **259**, 116-128 (1991).

29 Ataka, K., Yotsuyanagi, Takao & Osawa, M. Potential-Dependent Reorientation of Water Molecules at an Electrode/Electrolyte Interface Studied by Surface-Enhanced Infrared Absorption Spectroscopy. *J. Chem. Phys.* **100**, 10664-10672 (1996).

30 Yao, Y., Zhu, S., Wang, H., Li, H. & Shao, M. A Spectroscopic Study on the Nitrogen Electrochemical Reduction Reaction on Gold and Platinum Surfaces. *J. Am. Chem. Soc.* **140**, 1496-1501 (2018).

31 Zhu, S. *et al.* The role of ruthenium in improving the kinetics of hydrogen oxidation and evolution reactions of platinum. *Nat. Catal.* **4**, 711-718 (2021).

32 Zhao, Y. *et al.* Speciation of Cu Surfaces During the Electrochemical CO Reduction Reaction. *J. Am. Chem. Soc.* **142**, 9735-9743 (2020).

33 Orlovskaya, N. *et al.* Detection of temperature- and stress-induced modifications of LaCoO<sub>3</sub> by micro-Raman spectroscopy. *Phys. Rev. B* **72**, 014122 (2005).

34 Deng, Y., Handoko, A. D., Du, Y., Xi, S. & Yeo, B. S. In Situ Raman Spectroscopy of Copper and Copper Oxide Surfaces during Electrochemical Oxygen Evolution Reaction: Identification of Cu(II) Oxides as Catalytically Active Species. *ACS Catal.* **6**, 2473-2481 (2016).

35 Bodappa, N. *et al.* Early Stages of Electrochemical Oxidation of Cu(111) and Polycrystalline Cu Surfaces Revealed by in Situ Raman Spectroscopy. *J. Am. Chem. Soc.* **141**, 12192-12196 (2019).

36 Bae, S.-E., Stewart, K. L. & Gewirth, A. A. Nitrate Adsorption and Reduction on Cu(100) in Acidic Solution. *J. Am. Chem. Soc.* **129**, 10171-10180 (2007).

37 Escribano, R. M. *et al.* The low-frequency Raman and IR spectra of nitric acid hydrates. *Vib. Spectrosc.* **43**, 254-259 (2007).

- 38 Butcher, D. P. & Gewirth, A. A. Nitrate reduction pathways on Cu single crystal surfaces: Effect of oxide and  $\text{Cl}^-$ . *Nano Energy* **29**, 457-465 (2016).
- 39 Zhou, Z., Huang, G. G., Kato, T. & Ozaki, Y. Experimental parameters for the SERS of nitrate ion for label-free semi-quantitative detection of proteins and mechanism for proteins to form SERS hot sites: a SERS study. *J. Raman. Spectrosc.* **42**, 1713-1721 (2011).
- 40 GOODGAME., D. M. L. & HITCHMAN., M. A. Studies of Nitro and Nitrito Complexes. II. Complexes Containing Chelating  $\text{NO}_2$  Groups. *Inorg. Chem.* **4**, 721-725 (1964).
- 41 Nakamoto, K. *Infrared and Raman Spectra of Inorganic and Coordination Compounds*. (John Wiley & Sons, New York, 2008).
- 42 Ling, Y., Mills, C., Weber, R., Yang, L. & Zhang, Y. NMR, IR/Raman, and structural properties in HNO and RNO (R = alkyl and aryl) metalloporphyrins with implication for the HNO-myoglobin complex. *J. Am. Chem. Soc.* **132**, 1583-1591 (2010).
- 43 Wen., N. & Brooker., M. H. Ammonium Carbonate, Ammonium Bicarbonate, and Ammonium Carbamate Equilibria: A Raman Study. *J. Phys. Chem.* **99**, 359-368 (1995).
- 44 Hu, T., Wang, C., Wang, M., Li, C. M. & Guo, C. Theoretical Insights into Superior Nitrate Reduction to Ammonia Performance of Copper Catalysts. *ACS Catal.* **11**, 14417-14427 (2021).
